# Supplementary material for: Lipidomic Profile Revealed the Association of Plasma Lysophosphatidylcholines with Adolescent Obesity
Source: Hindawi journal article supplement (doi:10.1155/2019/1382418), 2019-12-13
Supplement: f1 [file 1382418.f1.pdf]

**Table S1: The body mass index reference for screening overweight and obesity in Chinese boys aged 13-18 years <sup>[20]</sup>**

| Age (years) | Overweight | Obesity |
|-------------|------------|---------|
| 13-         | 21.9       | 25.7    |
| 14-         | 22.6       | 26.4    |
| 15-         | 23.1       | 26.9    |
| 16-         | 23.5       | 27.4    |
| 17-         | 23.8       | 27.8    |
| 18          | 24.0       | 28.0    |

**Table S2: The R<sup>2</sup> and Q<sup>2</sup> values of these partial least squares discriminant analysis (PLS-DA) models**

|                         |   | R <sup>2</sup> X(cum) | R <sup>2</sup> Y(cum) | Q <sup>2</sup> (cum) |
|-------------------------|---|-----------------------|-----------------------|----------------------|
| O (50) vs. N (50)       | 1 | 0.14                  | 0.35                  | 0.24                 |
|                         | 2 | 0.36                  | 0.48                  | 0.33                 |
|                         | 3 | 0.48                  | 0.59                  | 0.40                 |
| ON (n=25) vs. NN (n=25) | 1 | 0.19                  | 0.35                  | 0.11                 |
|                         | 2 | 0.31                  | 0.59                  | 0.21                 |
| OA (n=25) vs. NA (n=25) | 1 | 0.18                  | 0.53                  | 0.43                 |
|                         | 2 | 0.32                  | 0.69                  | 0.51                 |

a Abbreviations: N, Normal-weight; O, obese; NN, Normal-weight with traditional Normal clinical plasma lipid levels; NA, Normal-weight with traditional Abnormal clinical plasma lipid levels; ON, Obese with traditional Normal clinical plasma lipid levels; OA, Obese with traditional Abnormal clinical plasma lipid levels.

**Table S3: The lipids levels significantly differed between normal-weight and obese adolescents in different clinical lipid levels <sup>a</sup>**

|          | NN             | NA             | ON             | OA         | <i>P</i> <sup>c</sup>     | <i>p</i> <sup>d</sup>      | ON vs. NN                   |                           |                           | OA vs. NA                   |                           |                           |
|----------|----------------|----------------|----------------|------------|---------------------------|----------------------------|-----------------------------|---------------------------|---------------------------|-----------------------------|---------------------------|---------------------------|
|          |                |                |                |            |                           |                            | difference (%) <sup>b</sup> | <i>P</i>                  | <i>p</i> <sup>d</sup>     | difference (%) <sup>b</sup> | <i>P</i>                  | <i>p</i> <sup>d</sup>     |
| LPC 18:2 | 28.16±<br>6.79 | 24.00±<br>5.60 | 19.35±<br>5.84 | 19.61±3.48 | 8.07×<br>10 <sup>-7</sup> | 4.07×<br>10 <sup>-10</sup> | -31.29                      | 1.08×<br>10 <sup>-4</sup> | 7.87×<br>10 <sup>-5</sup> | -18.14                      | 2.02×<br>10 <sup>-2</sup> | 7.74×<br>10 <sup>-6</sup> |
| LPC 18:1 | 13.66±<br>2.53 | 13.69±<br>2.51 | 10.11±2.4      | 11.76±1.69 | 2.39×<br>10 <sup>-6</sup> | 1.09×<br>10 <sup>-9</sup>  | -26.01                      | 9.91×<br>10 <sup>-5</sup> | 4.42×<br>10 <sup>-5</sup> | -14.13                      | 2.02×<br>10 <sup>-2</sup> | 2.54×<br>10 <sup>-6</sup> |
| LPC 20:2 | 0.22±<br>0.05  | 0.23±0.04      | 0.17±0.04      | 0.20±0.05  | 7.58×<br>10 <sup>-5</sup> | 1.12×<br>10 <sup>-5</sup>  | -23.15                      | 4.40×<br>10 <sup>-3</sup> | 2.72×<br>10 <sup>-3</sup> | -14.69                      | 3.47×<br>10 <sup>-2</sup> | 1.38×<br>10 <sup>-4</sup> |
| LPC 20:1 | 0.16±<br>0.05  | 0.16±0.04      | 0.12±0.03      | 0.13±0.03  | 7.28×<br>10 <sup>-5</sup> | 2.12×<br>10 <sup>-6</sup>  | -22.88                      | 6.67×<br>10 <sup>-3</sup> | 1.57×<br>10 <sup>-2</sup> | -22.27                      | 4.40×<br>10 <sup>-3</sup> | 3.16×<br>10 <sup>-5</sup> |
| LPC 20:0 | 0.09±<br>0.03  | 0.10±0.02      | 0.07±0.02      | 0.08±0.02  | 1.33×<br>10 <sup>-5</sup> | 4.14×<br>10 <sup>-6</sup>  | -27.66                      | 7.33×<br>10 <sup>-4</sup> | 4.21×<br>10 <sup>-3</sup> | -18.36                      | 2.28×<br>10 <sup>-2</sup> | 6.16×<br>10 <sup>-5</sup> |
| PC 32:0  | 6.93±<br>1.03  | 6.75±1.35      | 5.80±0.85      | 8.16±1.49  | 2.25×<br>10 <sup>-7</sup> | 4.51×<br>10 <sup>-3</sup>  | -16.32                      | 4.91×<br>10 <sup>-4</sup> | 9.06×<br>10 <sup>-3</sup> | 20.87                       | 4.40×<br>10 <sup>-3</sup> | 3.05×<br>10 <sup>-2</sup> |

a All values are presented as the means ± SD of plasma lipid concentration in umol/L.

b Percentage (%) of difference between obese and normal-weight adolescents.

c We only listed lipidome whose concentrations differed significantly after Benjamini-Hochberg correction for multiple testing.

d The P-value was presented after the normalization with the total concentration of glycerophospholipids.

e Abbreviations: NN, Normal-weight with traditional Normal clinical plasma lipid levels; NA, Normal-weight with traditional Abnormal clinical plasma lipid levels; ON, Obese with traditional Normal clinical plasma lipid levels; OA, Obese with traditional Abnormal clinical plasma lipid levels; LPC x: y, lysophosphatidylcholines with acyl chain length x and y double bonds.

**Table S4: 328 lipids from 24 classes were described and compared in different groups <sup>a</sup>**

|             | NN        | NA        | ON        | OA         | <i>P</i>                     | ON vs. NN<br>differenc<br>e (%) <sup>b</sup> | <i>P</i>                    | OA vs. NA<br>differenc<br>e (%) <sup>b</sup> | <i>P</i>                    |
|-------------|-----------|-----------|-----------|------------|------------------------------|----------------------------------------------|-----------------------------|----------------------------------------------|-----------------------------|
| Total dhCer | 0.39±0.07 | 0.42±0.12 | 0.54±0.11 | 0.82±0.26  | <b>1.37×10<sup>-11</sup></b> | 6.80                                         | 2.20×10 <sup>-1</sup>       | 52.42                                        | <b>1.53×10<sup>-4</sup></b> |
| dhCer 16:0  | 0.05±0.01 | 0.04±0.01 | 0.04±0.01 | 0.05±0.01  | <b>1.13×10<sup>-11</sup></b> | -9.46                                        | 6.40×10 <sup>-1</sup>       | 19.52                                        | <b>4.62×10<sup>-2</sup></b> |
| dhCer 20:0  | 0.02±0.01 | 0.02±0.01 | 0.02±0.01 | 0.03±0.01  | <b>2.19×10<sup>-6</sup></b>  | 26.08                                        | 1.74×10 <sup>-1</sup>       | 32.46                                        | <b>4.37×10<sup>-2</sup></b> |
| dhCer 22:0  | 0.08±0.02 | 0.09±0.03 | 0.12±0.03 | 0.19±0.07  | <b>9.76×10<sup>-11</sup></b> | 10.96                                        | 3.33×10 <sup>-1</sup>       | 60.97                                        | <b>2.77×10<sup>-4</sup></b> |
| dhCer 24:1  | 0.07±0.02 | 0.07±0.03 | 0.10±0.02 | 0.14±0.05  | <b>8.91×10<sup>-10</sup></b> | 8.52                                         | 9.50×10 <sup>-1</sup>       | 51.37                                        | <b>4.91×10<sup>-4</sup></b> |
| dhCer 24:0  | 0.18±0.04 | 0.20±0.06 | 0.26±0.06 | 0.41±0.15  | <b>6.37×10<sup>-11</sup></b> | 6.77                                         | 8.75×10 <sup>-1</sup>       | 56.09                                        | <b>2.54×10<sup>-4</sup></b> |
| Total Cer   | 6.43±1.35 | 5.67±1.45 | 8.80±1.63 | 9.61±1.58  | <b>2.22×10<sup>-11</sup></b> | -11.80                                       | 7.00×10 <sup>-2</sup>       | 9.23                                         | 6.00×10 <sup>-2</sup>       |
| Cer 16:0    | 0.23±0.04 | 0.20±0.05 | 0.28±0.05 | 0.30±0.06  | <b>1.06×10<sup>-7</sup></b>  | -14.22                                       | <b>3.90×10<sup>-2</sup></b> | 7.95                                         | 8.47×10 <sup>-1</sup>       |
| Cer 18:0    | 0.09±0.04 | 0.09±0.03 | 0.11±0.03 | 0.14±0.05  | <b>5.27×10<sup>-6</sup></b>  | -1.48                                        | 1.00×10 <sup>0</sup>        | 33.45                                        | 7.96×10 <sup>-2</sup>       |
| Cer 20:0    | 0.10±0.03 | 0.09±0.03 | 0.12±0.03 | 0.14±0.04  | <b>2.10×10<sup>-7</sup></b>  | -9.65                                        | 6.97×10 <sup>-1</sup>       | 15.15                                        | 6.26×10 <sup>-1</sup>       |
| Cer 22:0    | 0.93±0.22 | 0.86±0.24 | 1.27±0.30 | 1.49±0.38  | <b>1.07×10<sup>-9</sup></b>  | -7.57                                        | 8.02×10 <sup>-1</sup>       | 17.35                                        | 1.66×10 <sup>-1</sup>       |
| Cer 24:1    | 1.04±0.29 | 0.89±0.24 | 1.40±0.30 | 1.43±0.35  | <b>1.64×10<sup>-8</sup></b>  | -14.49                                       | 1.98×10 <sup>-1</sup>       | 1.89                                         | 1.00×10 <sup>0</sup>        |
| Cer 24:0    | 4.04±0.92 | 3.55±1.00 | 5.61±1.17 | 6.10±1.03  | <b>8.21×10<sup>-11</sup></b> | -12.23                                       | 4.80×10 <sup>-1</sup>       | 8.70                                         | 4.37×10 <sup>-1</sup>       |
| Total MHC   | 7.35±1.72 | 7.23±1.59 | 9.60±2.69 | 10.07±3.23 | <b>7.75×10<sup>-5</sup></b>  | -1.64                                        | 8.70×10 <sup>-1</sup>       | 4.94                                         | 9.60×10 <sup>-1</sup>       |
| MHC 16:0    | 0.73±0.14 | 0.72±0.17 | 0.94±0.24 | 1.02±0.31  | <b>4.73×10<sup>-6</sup></b>  | -1.02                                        | 1.00×10 <sup>0</sup>        | 8.75                                         | 9.97×10 <sup>-1</sup>       |
| MHC 18:0    | 0.11±0.03 | 0.10±0.02 | 0.13±0.04 | 0.13±0.03  | <b>8.46×10<sup>-3</sup></b>  | -2.92                                        | 1.00×10 <sup>0</sup>        | -1.04                                        | 1.00×10 <sup>0</sup>        |
| MHC 20:0    | 0.12±0.04 | 0.11±0.03 | 0.16±0.05 | 0.16±0.06  | <b>6.96×10<sup>-4</sup></b>  | -4.77                                        | 1.00×10 <sup>0</sup>        | -0.02                                        | 1.00×10 <sup>0</sup>        |
| MHC 22:0    | 1.78±0.45 | 1.79±0.42 | 2.38±0.77 | 2.50±0.76  | <b>1.02×10<sup>-4</sup></b>  | 0.94                                         | 9.93×10 <sup>-1</sup>       | 5.05                                         | 9.97×10 <sup>-1</sup>       |

|           |           |           |           |           |                             |        |                             |       |                             |
|-----------|-----------|-----------|-----------|-----------|-----------------------------|--------|-----------------------------|-------|-----------------------------|
| MHC 24:1  | 1.67±0.51 | 1.65±0.50 | 2.13±0.62 | 2.21±0.98 | <b>5.26×10<sup>-3</sup></b> | -1.19  | 1.00×10 <sup>0</sup>        | 3.85  | 9.93×10 <sup>-1</sup>       |
| MHC 24:0  | 2.95±0.73 | 2.85±0.59 | 3.86±1.17 | 4.05±1.28 | <b>4.66×10<sup>-5</sup></b> | -3.42  | 1.00×10 <sup>0</sup>        | 4.97  | 9.99×10 <sup>-1</sup>       |
| Total DHC | 4.18±0.89 | 4.28±0.89 | 4.91±1.19 | 5.17±1.48 | <b>1.18×10<sup>-2</sup></b> | 2.28   | 6.20×10 <sup>-1</sup>       | 5.25  | 7.50×10 <sup>-1</sup>       |
| DHC 16:0  | 3.32±0.73 | 3.44±0.71 | 3.96±0.97 | 4.18±1.22 | <b>7.82×10<sup>-3</sup></b> | 3.48   | 9.72×10 <sup>-1</sup>       | 5.46  | 9.99×10 <sup>-1</sup>       |
| DHC 18:0  | 0.05±0.02 | 0.04±0.01 | 0.05±0.02 | 0.06±0.02 | <b>4.10×10<sup>-2</sup></b> | -9.63  | 7.11×10 <sup>-1</sup>       | 22.38 | 2.98×10 <sup>-1</sup>       |
| DHC 20:0  | 0.03±0.01 | 0.03±0.01 | 0.03±0.01 | 0.03±0.01 | 6.61×10 <sup>-1</sup>       | 3.85   | 1.00×10 <sup>0</sup>        | 2.43  | 9.93×10 <sup>-1</sup>       |
| DHC 22:0  | 0.12±0.03 | 0.12±0.03 | 0.14±0.05 | 0.15±0.03 | <b>2.12×10<sup>-2</sup></b> | -2.36  | 1.00×10 <sup>0</sup>        | 7.16  | 7.25×10 <sup>-1</sup>       |
| DHC 24:1  | 0.52±0.15 | 0.51±0.15 | 0.57±0.17 | 0.58±0.23 | 5.87×10 <sup>-1</sup>       | -0.74  | 9.99×10 <sup>-1</sup>       | 2.44  | 1.00×10 <sup>0</sup>        |
| DHC 24:0  | 0.14±0.04 | 0.13±0.03 | 0.17±0.05 | 0.17±0.04 | <b>3.62×10<sup>-3</sup></b> | -6.96  | 9.64×10 <sup>-1</sup>       | 3.98  | 9.96×10 <sup>-1</sup>       |
| Total THC | 1.52±0.25 | 1.33±0.30 | 1.52±0.36 | 1.49±0.38 | 9.82×10 <sup>-2</sup>       | -12.38 | 1.00×10 <sup>-1</sup>       | -2.13 | 8.50×10 <sup>-1</sup>       |
| THC 16:0  | 0.76±0.12 | 0.66±0.14 | 0.77±0.18 | 0.77±0.17 | 2.98×10 <sup>-2</sup>       | -12.39 | <b>4.89×10<sup>-2</sup></b> | -0.99 | 1.00×10 <sup>0</sup>        |
| THC 20:0  | 0.04±0.02 | 0.04±0.01 | 0.04±0.02 | 0.04±0.02 | 9.12×10 <sup>-1</sup>       | -5.17  | 1.00×10 <sup>0</sup>        | -8.87 | 9.81×10 <sup>-1</sup>       |
| THC 22:0  | 0.21±0.05 | 0.19±0.06 | 0.20±0.06 | 0.19±0.06 | 5.70×10 <sup>-1</sup>       | -8.81  | 8.36×10 <sup>-1</sup>       | -6.84 | 9.68×10 <sup>-1</sup>       |
| THC 24:1  | 0.30±0.07 | 0.27±0.08 | 0.30±0.09 | 0.29±0.12 | 2.99×10 <sup>-1</sup>       | -10.73 | 3.21×10 <sup>-1</sup>       | -3.03 | 9.79×10 <sup>-1</sup>       |
| THC 24:0  | 0.21±0.04 | 0.17±0.04 | 0.20±0.06 | 0.20±0.06 | <b>3.09×10<sup>-2</sup></b> | -19.58 | 8.74×10 <sup>-3</sup>       | 1.06  | 1.00×10 <sup>0</sup>        |
| Total GM3 | 2.32±0.32 | 2.20±0.37 | 2.73±0.46 | 3.01±0.62 | <b>2.84×10<sup>-7</sup></b> | -5.18  | 2.30×10 <sup>-1</sup>       | 9.90  | 1.70×10 <sup>-1</sup>       |
| GM3 16:0  | 0.76±0.11 | 0.71±0.13 | 0.83±0.15 | 0.89±0.18 | <b>2.23×10<sup>-4</sup></b> | -6.68  | 2.45×10 <sup>-1</sup>       | 7.77  | 9.19×10 <sup>-1</sup>       |
| GM3 18:0  | 0.30±0.07 | 0.29±0.07 | 0.34±0.09 | 0.38±0.1  | <b>3.31×10<sup>-3</sup></b> | -4.07  | 9.86×10 <sup>-1</sup>       | 12.74 | 8.14×10 <sup>-1</sup>       |
| GM3 20:0  | 0.12±0.03 | 0.12±0.02 | 0.14±0.03 | 0.17±0.04 | <b>3.77×10<sup>-6</sup></b> | 1.67   | 9.99×10 <sup>-1</sup>       | 17.29 | 2.07×10 <sup>-1</sup>       |
| GM3 22:0  | 0.34±0.06 | 0.34±0.08 | 0.44±0.1  | 0.55±0.13 | <b>1.14×10<sup>-9</sup></b> | -0.11  | 1.00×10 <sup>0</sup>        | 23.53 | <b>2.74×10<sup>-2</sup></b> |
| GM3 24:1  | 0.46±0.11 | 0.42±0.09 | 0.57±0.13 | 0.57±0.18 | <b>6.98×10<sup>-5</sup></b> | -8.34  | 7.90×10 <sup>-1</sup>       | 1.62  | 1.00×10 <sup>0</sup>        |
| GM3 24:0  | 0.35±0.08 | 0.33±0.08 | 0.41±0.08 | 0.44±0.11 | <b>5.61×10<sup>-5</sup></b> | -5.94  | 8.91×10 <sup>-1</sup>       | 5.93  | 9.50×10 <sup>-1</sup>       |

|          |              |                  |                  |              |                              |        |                       |       |                             |
|----------|--------------|------------------|------------------|--------------|------------------------------|--------|-----------------------|-------|-----------------------------|
| Total SM | 207.74±22.08 | 206.03±<br>35.34 | 241.86±<br>38.07 | 296.86±53.32 | <b>3.85×10<sup>-10</sup></b> | -0.82  | 3.50×10 <sup>-1</sup> | 22.74 | <b>6.35×10<sup>-7</sup></b> |
| SM 31:1  | 0.08±0.02    | 0.09±0.03        | 0.10±0.03        | 0.13±0.04    | <b>2.93×10<sup>-5</sup></b>  | 6.21   | 9.50×10 <sup>-1</sup> | 21.32 | 3.09×10 <sup>-1</sup>       |
| SM 32:2  | 0.40±0.08    | 0.46±0.1         | 0.47±1.18        | 0.69±0.17    | <b>1.07×10<sup>-9</sup></b>  | 14.20  | 1.08×10 <sup>-1</sup> | 46.74 | <b>4.08×10<sup>-6</sup></b> |
| SM 32:1  | 3.79±0.93    | 4.06±1.16        | 4.73±1.18        | 6.27±1.85    | <b>2.10×10<sup>-7</sup></b>  | 7.33   | 9.60×10 <sup>-1</sup> | 32.45 | <b>6.67×10<sup>-3</sup></b> |
| SM 32:0  | 0.08±0.03    | 0.09±0.03        | 0.11±0.03        | 0.16±0.08    | <b>3.37×10<sup>-9</sup></b>  | 6.01   | 9.81×10 <sup>-1</sup> | 41.85 | <b>2.02×10<sup>-2</sup></b> |
| SM 33:1  | 2.56±0.53    | 2.63±0.69        | 3.11±0.81        | 3.60±0.82    | <b>1.78×10<sup>-5</sup></b>  | 2.56   | 1.00×10 <sup>0</sup>  | 16.02 | 2.87×10 <sup>-1</sup>       |
| SM 34:3  | 0.05±0.01    | 0.05±0.01        | 0.05±0.02        | 0.07±0.02    | <b>2.17×10<sup>-5</sup></b>  | 11.20  | 7.11×10 <sup>-1</sup> | 29.42 | <b>2.67×10<sup>-3</sup></b> |
| SM 34:2  | 11.19±1.59   | 11.09±1.78       | 12.21±1.73       | 14.77±2.45   | <b>1.89×10<sup>-7</sup></b>  | -0.87  | 9.72×10 <sup>-1</sup> | 20.98 | <b>1.71×10<sup>-3</sup></b> |
| SM 34:1  | 75.34±9.93   | 71.23±13.92      | 84.29±15.79      | 94.9±17.97   | <b>3.75×10<sup>-6</sup></b>  | -5.46  | 3.71×10 <sup>-1</sup> | 12.58 | 5.23×10 <sup>-1</sup>       |
| SM 34:0  | 35.01±7.49   | 30.92±6.82       | 41.6±9.75        | 59.35±22.03  | <b>8.81×10<sup>-9</sup></b>  | -11.69 | 3.33×10 <sup>-1</sup> | 42.67 | <b>5.43×10<sup>-3</sup></b> |
| SM 35:2  | 0.28±0.06    | 0.29±0.07        | 0.32±0.06        | 0.37±0.07    | <b>3.21×10<sup>-5</sup></b>  | 3.65   | 9.98×10 <sup>-1</sup> | 18.41 | <b>2.15×10<sup>-2</sup></b> |
| SM 35:1  | 1.34±0.28    | 1.44±0.36        | 1.68±0.42        | 1.88±0.38    | <b>1.22×10<sup>-5</sup></b>  | 7.31   | 8.57×10 <sup>-1</sup> | 11.57 | 4.51×10 <sup>-1</sup>       |
| SM 36:3  | 0.52±0.10    | 0.54±0.12        | 0.57±0.1         | 0.68±0.13    | <b>1.58×10<sup>-4</sup></b>  | 4.85   | 9.90×10 <sup>-1</sup> | 17.53 | <b>2.91×10<sup>-2</sup></b> |
| SM 36:2  | 6.44±1.48    | 7.29±1.58        | 7.95±1.58        | 9.76±2.28    | <b>6.59×10<sup>-7</sup></b>  | 13.24  | 2.65×10 <sup>-1</sup> | 22.79 | <b>1.90×10<sup>-2</sup></b> |
| SM 36:1  | 10.62±2.11   | 12.41±3.05       | 14.06±3.01       | 17.61±3.64   | <b>1.90×10<sup>-9</sup></b>  | 16.79  | 1.08×10 <sup>-1</sup> | 25.22 | <b>3.56×10<sup>-3</sup></b> |
| SM 37:2  | 0.11±0.03    | 0.13±0.05        | 0.14±0.04        | 0.16±0.05    | <b>5.59×10<sup>-3</sup></b>  | 16.25  | 9.39×10 <sup>-1</sup> | 14.62 | 5.38×10 <sup>-1</sup>       |
| SM 38:2  | 4.4±0.88     | 4.35±0.72        | 4.78±0.69        | 5.17±0.95    | <b>3.26×10<sup>-3</sup></b>  | -1.15  | 1.00×10 <sup>0</sup>  | 8.20  | 7.77×10 <sup>-1</sup>       |
| SM 38:1  | 11.09±2.12   | 11.68±2.93       | 12.63±2.32       | 14.25±2.85   | <b>8.96×10<sup>-4</sup></b>  | 5.24   | 9.81×10 <sup>-1</sup> | 12.73 | 3.21×10 <sup>-1</sup>       |
| SM 39:1  | 3.32±0.68    | 3.53±0.78        | 3.58±0.8         | 4.07±0.78    | <b>7.35×10<sup>-3</sup></b>  | 6.30   | 8.02×10 <sup>-1</sup> | 13.71 | 1.81×10 <sup>-1</sup>       |
| SM 41:2  | 8.94±1.30    | 8.92±1.53        | 9.50±1.33        | 10.42±1.99   | <b>3.81×10<sup>-3</sup></b>  | -0.27  | 1.00×10 <sup>0</sup>  | 9.73  | 5.96×10 <sup>-1</sup>       |
| SM 41:1  | 10.40±1.64   | 11.08±2.44       | 12.64±2.22       | 16.72±3.19   | <b>2.35×10<sup>-10</sup></b> | 6.52   | 9.50×10 <sup>-1</sup> | 32.22 | <b>2.33×10<sup>-5</sup></b> |
| SM 42:1  | 21.77±3.33   | 23.77±4.81       | 27.3±5.53        | 35.82±7.24   | <b>2.32×10<sup>-10</sup></b> | 9.17   | 5.23×10 <sup>-1</sup> | 31.21 | <b>2.15×10<sup>-4</sup></b> |

|          |                    |                   |                   |                    |                              |        |                             |        |                             |
|----------|--------------------|-------------------|-------------------|--------------------|------------------------------|--------|-----------------------------|--------|-----------------------------|
| Total PC | 1029.85±<br>105.98 | 975.82±<br>118.89 | 1152.73±<br>140.1 | 1308.93±<br>153.13 | <b>1.31×10<sup>-9</sup></b>  | -5.25  | 9.00×10 <sup>-2</sup>       | 13.55  | <b>5.13×10<sup>-7</sup></b> |
| PC 28:0  | 0.05±0.04          | 0.04±0.02         | 0.06±0.04         | 0.13±0.12          | <b>4.63×10<sup>-5</sup></b>  | -28.97 | 9.68×10 <sup>-1</sup>       | 108.66 | 8.83×10 <sup>-2</sup>       |
| PC 29:0  | 0.02±0.01          | 0.02±0.01         | 0.01±0.01         | 0.03±0.02          | <b>2.98×10<sup>-2</sup></b>  | -13.90 | 9.91×10 <sup>-1</sup>       | 42.40  | 6.11×10 <sup>-1</sup>       |
| PC 30:0  | 0.86±0.39          | 0.75±0.24         | 1.08±0.37         | 1.71±0.86          | <b>1.60×10<sup>-6</sup></b>  | -13.30 | 9.94×10 <sup>-1</sup>       | 58.70  | <b>1.57×10<sup>-2</sup></b> |
| PC 31:1  | 0.37±0.09          | 0.45±0.11         | 0.39±0.10         | 0.53±0.11          | <b>2.53×10<sup>-6</sup></b>  | 7.76   | 5.96×10 <sup>-1</sup>       | 17.76  | 5.17×10 <sup>-2</sup>       |
| PC 31:0  | 0.23±0.08          | 0.25±0.09         | 0.21±0.08         | 0.32±0.14          | <b>1.31×10<sup>-2</sup></b>  | -8.71  | 9.64×10 <sup>-1</sup>       | 25.19  | 3.97×10 <sup>-1</sup>       |
| PC 32:3  | 0.17±0.04          | 0.17±0.04         | 0.18±0.03         | 0.24±0.05          | <b>9.13×10<sup>-8</sup></b>  | 0.06   | 1.00×10 <sup>0</sup>        | 33.89  | <b>8.31×10<sup>-5</sup></b> |
| PC 32:2  | 3.35±0.94          | 3.52±0.80         | 4.25±0.70         | 5.61±1.27          | <b>9.32×10<sup>-10</sup></b> | 4.88   | 9.19×10 <sup>-1</sup>       | 31.92  | <b>1.98×10<sup>-4</sup></b> |
| PC 32:1  | 6.55±2.15          | 6.79±1.71         | 8.41±2.11         | 13.26±4.49         | <b>6.10×10<sup>-10</sup></b> | 3.72   | 9.03×10 <sup>-1</sup>       | 57.56  | <b>1.29×10<sup>-4</sup></b> |
| PC32:0   | 6.93±1.03          | 5.80±0.85         | 6.75±1.35         | 8.16±1.49          | <b>2.25×10<sup>-7</sup></b>  | -16.32 | <b>4.91×10<sup>-4</sup></b> | 20.87  | <b>4.40×10<sup>-3</sup></b> |
| PC 33:3  | 0.02±0.01          | 0.02±0.01         | 0.02±0.01         | 0.02±0.01          | <b>6.31×10<sup>-3</sup></b>  | -4.50  | 1.00×10 <sup>0</sup>        | 12.30  | 4.51×10 <sup>-3</sup>       |
| PC 33:2  | 1.36±0.44          | 1.57±0.41         | 1.28±0.34         | 1.65±0.31          | <b>1.99×10<sup>-3</sup></b>  | -6.05  | 9.99×10 <sup>-1</sup>       | 5.31   | 9.60×10 <sup>-3</sup>       |
| PC 33:1  | 1.11±0.28          | 1.14±0.31         | 1.02±0.34         | 1.42±0.49          | <b>5.96×10<sup>-3</sup></b>  | -7.65  | 8.57×10 <sup>-1</sup>       | 24.98  | 1.51×10 <sup>-3</sup>       |
| PC 33:0  | 0.64±0.16          | 0.61±0.21         | 0.59±0.23         | 0.71±0.26          | 1.15×10 <sup>-1</sup>        | -7.80  | 6.40×10 <sup>-1</sup>       | 16.40  | 3.21×10 <sup>-1</sup>       |
| PC 34:5  | 0.01±0.01          | 0.01±0.01         | 0.02±0.01         | 0.03±0.02          | <b>2.17×10<sup>-5</sup></b>  | 11.00  | 9.91×10 <sup>-1</sup>       | 87.67  | 9.30×10 <sup>-2</sup>       |
| PC 34:4  | 0.46±0.21          | 0.5±0.19          | 0.68±0.21         | 0.95±0.32          | <b>7.48×10<sup>-8</sup></b>  | 8.57   | 9.32×10 <sup>-1</sup>       | 38.48  | <b>2.15×10<sup>-2</sup></b> |
| PC 34:3  | 6.57±1.95          | 6.05±1.23         | 7.68±1.68         | 10.19±2.6          | <b>3.78×10<sup>-8</sup></b>  | -7.92  | 9.99×10 <sup>-1</sup>       | 32.68  | <b>2.48×10<sup>-3</sup></b> |
| PC 34:2  | 247.63±30.8        | 225.89±<br>32.84  | 250.84±<br>35.08  | 274.68±38.6        | <b>5.42×10<sup>-4</sup></b>  | -8.78  | 1.74×10 <sup>-1</sup>       | 9.50   | 1.66×10 <sup>-3</sup>       |
| PC 34:1  | 101.81±19.19       | 91±15.14          | 114.39±<br>18.32  | 136.79±27.09       | <b>1.35×10<sup>-8</sup></b>  | -10.61 | 8.83×10 <sup>-1</sup>       | 19.58  | <b>1.57×10<sup>-2</sup></b> |
| PC 34:0  | 1.76±0.26          | 1.55±0.36         | 2.23±0.47         | 2.45±0.42          | <b>5.60×10<sup>-10</sup></b> | -12.41 | <b>3.68×10<sup>-1</sup></b> | 10.21  | 3.84×10 <sup>-1</sup>       |

|         |              |             |             |              |                              |        |                       |        |                             |
|---------|--------------|-------------|-------------|--------------|------------------------------|--------|-----------------------|--------|-----------------------------|
| PC 35:4 | 0.45±0.15    | 0.53±0.17   | 0.45±0.17   | 0.59±0.14    | <b>3.51×10<sup>-3</sup></b>  | -0.81  | 1.00×10 <sup>0</sup>  | 11.59  | 7.77×10 <sup>-1</sup>       |
| PC 35:3 | 0.62±0.20    | 0.71±0.18   | 0.57±0.15   | 0.74±0.13    | <b>8.96×10<sup>-4</sup></b>  | -7.62  | 9.99×10 <sup>-1</sup> | 4.13   | 7.77×10 <sup>-1</sup>       |
| PC 35:2 | 5.11±1.21    | 5.55±1.67   | 4.63±1.25   | 5.14±0.78    | 2.03×10 <sup>-1</sup>        | -9.45  | 6.69×10 <sup>-1</sup> | -7.38  | 9.98×10 <sup>-1</sup>       |
| PC 35:1 | 2.18±0.56    | 2.40±0.69   | 2.09±0.53   | 2.70±0.74    | <b>4.25×10<sup>-3</sup></b>  | -4.21  | 9.99×10 <sup>-1</sup> | 12.33  | 3.45×10 <sup>-1</sup>       |
| PC 35:0 | 0.07±0.03    | 0.09±0.05   | 0.07±0.04   | 0.12±0.07    | <b>6.62×10<sup>-3</sup></b>  | -1.16  | 1.00×10 <sup>0</sup>  | 29.59  | 4.51×10 <sup>-1</sup>       |
| PC 36:6 | 0.22±0.10    | 0.24±0.10   | 0.34±0.12   | 0.43±0.14    | <b>2.53×10<sup>-7</sup></b>  | 10.98  | 8.36×10 <sup>-1</sup> | 24.77  | 1.51×10 <sup>-3</sup>       |
| PC 36:5 | 5.46±2.30    | 5.39±1.62   | 6.92±2.39   | 9.93±3.81    | <b>2.09×10<sup>-6</sup></b>  | -1.33  | 9.97×10 <sup>-1</sup> | 43.48  | <b>1.90×10<sup>-3</sup></b> |
| PC 36:3 | 83.21±13.6   | 76.68±11.71 | 92.02±12.33 | 107.5±13.77  | <b>5.71×10<sup>-9</sup></b>  | -7.85  | 6.11×10 <sup>-1</sup> | 16.83  | <b>1.59×10<sup>-3</sup></b> |
|         |              | 174.54±     | 202.01±     |              |                              |        |                       |        |                             |
| PC 36:2 | 189.08±24.63 | 28.51       | 36.07       | 219.53±34.27 | <b>1.06×10<sup>-4</sup></b>  | -7.69  | 2.55×10 <sup>-1</sup> | 8.68   | 2.87×10 <sup>-1</sup>       |
| PC 36:1 | 30.47±6.26   | 29.33±5.13  | 37.38±9.09  | 49.46±12.84  | <b>4.19×10<sup>-9</sup></b>  | -3.76  | 9.64×10 <sup>-1</sup> | 32.31  | <b>2.14×10<sup>-3</sup></b> |
| PC 36:0 | 0.16±0.04    | 0.16±0.06   | 0.23±0.07   | 0.32±0.23    | <b>4.12×10<sup>-7</sup></b>  | -2.90  | 9.39×10 <sup>-1</sup> | 38.02  | 3.58×10 <sup>-1</sup>       |
| PC 37:6 | 0.16±0.08    | 0.23±0.09   | 0.17±0.08   | 0.23±0.08    | <b>2.42×10<sup>-4</sup></b>  | 3.68   | 1.00×10 <sup>0</sup>  | 0.15   | 1.00×10 <sup>0</sup>        |
| PC 37:5 | 0.22±0.09    | 0.21±0.08   | 0.27±0.11   | 0.29±0.12    | <b>2.59×10<sup>-2</sup></b>  | -5.93  | 9.93×10 <sup>-1</sup> | 8.39   | 9.98×10 <sup>-1</sup>       |
| PC 37:4 | 3.19±0.76    | 3.31±0.85   | 3.66±1.01   | 3.62±0.73    | 1.18×10 <sup>-1</sup>        | 3.61   | 9.94×10 <sup>-1</sup> | -1.09  | 1.00×10 <sup>0</sup>        |
| PC 38:7 | 0.72±0.31    | 0.66±0.22   | 0.98±0.34   | 0.99±0.20    | <b>5.63×10<sup>-6</sup></b>  | -8.83  | 9.96×10 <sup>-1</sup> | 1.78   | 9.79×10 <sup>-1</sup>       |
| PC 38:5 | 34.27±5.06   | 32.29±5.78  | 40.97±6.74  | 44.11±6.23   | <b>2.24×10<sup>-8</sup></b>  | -5.80  | 7.65×10 <sup>-1</sup> | 7.65   | 1.74×10 <sup>-1</sup>       |
| PC 38:4 | 77.61±13.76  | 81.63±17.48 | 96.57±20.19 | 103.97±16.77 | <b>4.11×10<sup>-6</sup></b>  | 5.19   | 9.60×10 <sup>-1</sup> | 7.67   | 6.26×10 <sup>-3</sup>       |
| PC 38:3 | 27.42±7.29   | 29.87±8.61  | 38.12±10.35 | 54.11±13.02  | <b>1.89×10<sup>-10</sup></b> | 8.92   | 9.19×10 <sup>-1</sup> | 41.92  | <b>2.54×10<sup>-3</sup></b> |
| PC 38:2 | 11,56±2.72   | 10.28±2.14  | 12.56±2.39  | 15.08±3.34   | <b>6.66×10<sup>-6</sup></b>  | -11.08 | 5.08×10 <sup>-1</sup> | 20.10  | <b>2.91×10<sup>-2</sup></b> |
| PC 39:7 | 0.03±0.02    | 0.03±0.01   | 0.03±0.02   | 0.02±0.01    | 4.23×10 <sup>-1</sup>        | 7.64   | 9.97×10 <sup>-1</sup> | -21.71 | 4.37×10 <sup>-3</sup>       |
| PC 39:6 | 0.69±0.30    | 0.77±0.30   | 0.66±0.25   | 0.71±0.21    | 4.44×10 <sup>-1</sup>        | -3.31  | 1.00×10 <sup>0</sup>  | -8.16  | 9.90×10 <sup>-3</sup>       |
| PC 39:5 | 0.48±0.13    | 0.59±0.17   | 0.49±0.13   | 0.58±0.13    | <b>1.13×10<sup>-2</sup></b>  | 1.79   | 1.00×10 <sup>0</sup>  | -1.63  | 1.00×10 <sup>0</sup>        |

|             |             |             |            |            |                              |        |                       |        |                             |
|-------------|-------------|-------------|------------|------------|------------------------------|--------|-----------------------|--------|-----------------------------|
| PC 40:8     | 0.92±0.30   | 0.74±0.21   | 1.05±0.33  | 0.91±0.18  | <b>1.59×10<sup>-3</sup></b>  | -19.12 | 1.03×10 <sup>-1</sup> | -13.45 | 6.26×10 <sup>-1</sup>       |
| PC 40:7     | 2.58±0.84   | 2.23±0.59   | 3.09±0.95  | 2.79±0.55  | <b>1.50×10<sup>-3</sup></b>  | -13.62 | 7.65×10 <sup>-1</sup> | -9.83  | 9.84×10 <sup>-1</sup>       |
| PC 40:6     | 15.93±4.14  | 18.12±4.57  | 21.77±6.8  | 27.1±6.52  | <b>8.52×10<sup>-8</sup></b>  | 13.74  | 2.55×10 <sup>-1</sup> | 24.52  | <b>3.47×10<sup>-2</sup></b> |
| PC 40:5     | 10.52±2.23  | 10.83±2.33  | 14.26±3.60 | 18.53±4.5  | <b>6.02×10<sup>-10</sup></b> | 2.90   | 9.99×10 <sup>-1</sup> | 29.87  | <b>8.18×10<sup>-3</sup></b> |
| PC 40:4     | 3.88±1.07   | 3.80±1.11   | 5.15±1.39  | 6.64±1.62  | <b>7.02×10<sup>-7</sup></b>  | -2.01  | 9.99×10 <sup>-1</sup> | 28.85  | <b>1.14×10<sup>-2</sup></b> |
| Total PC(0) | 53.49±10.56 | 51.64±13.01 | 51.17±8.88 | 49.65±7.97 | 6.95×10 <sup>-1</sup>        | -3.46  | 4.20×10 <sup>-1</sup> | -2.96  | 5.20×10 <sup>-1</sup>       |
| PC(0-32:2)  | 0.02±0.02   | 0.02±0.02   | 0.03±0.03  | 0.02±0.01  | 9.84×10 <sup>-1</sup>        | -1.69  | 1.00×10 <sup>0</sup>  | -17.92 | 1.00×10 <sup>0</sup>        |
| PC(0-32:1)  | 0.26±0.07   | 0.26±0.08   | 0.25±0.06  | 0.25±0.07  | 9.87×10 <sup>-1</sup>        | 1.28   | 1.00×10 <sup>0</sup>  | 1.49   | 1.00×10 <sup>0</sup>        |
| PC(0-32:0)  | 1.60±0.34   | 1.49±0.36   | 1.47±0.33  | 1.60±0.40  | 3.92×10 <sup>-1</sup>        | -6.91  | 6.40×10 <sup>-1</sup> | 9.15   | 8.86×10 <sup>-1</sup>       |
| PC(0-34:4)  | 0.11±0.04   | 0.11±0.04   | 0.11±0.05  | 0.11±0.04  | 9.47×10 <sup>-1</sup>        | 3.45   | 1.00×10 <sup>0</sup>  | 0.72   | 9.86×10 <sup>-3</sup>       |
| PC(0-34:3)  | 0.07±0.03   | 0.08±0.04   | 0.07±0.04  | 0.06±0.03  | 6.21×10 <sup>-1</sup>        | 0.80   | 1.00×10 <sup>0</sup>  | -11.49 | 1.00×10 <sup>0</sup>        |
| PC(0-34:2)  | 4.62±1.28   | 4.09±1.43   | 4.10±1.15  | 3.47±0.82  | <b>2.10×10<sup>-2</sup></b>  | -11.49 | 5.82×10 <sup>-1</sup> | -15.25 | 3.21×10 <sup>-1</sup>       |
| PC(0-34:1)  | 3.10±0.70   | 2.79±0.77   | 2.57±0.73  | 2.69±0.62  | <b>4.04×10<sup>-2</sup></b>  | -10.03 | 4.37×10 <sup>-1</sup> | 4.78   | 9.60×10 <sup>-1</sup>       |
| PC(0-35:4)  | 0.08±0.04   | 0.08±0.05   | 0.08±0.05  | 0.08±0.04  | 9.62×10 <sup>-1</sup>        | 4.89   | 1.00×10 <sup>0</sup>  | -1.14  | 1.00×10 <sup>0</sup>        |
| PC(0-36:5)  | 0.36±0.22   | 0.32±0.18   | 0.34±0.15  | 0.33±0.15  | 9.66×10 <sup>-1</sup>        | -11.11 | 9.97×10 <sup>-1</sup> | -3.40  | 9.97×10 <sup>-1</sup>       |
| PC(0-36:4)  | 12.84±3.03  | 12.59±3.48  | 12.78±2.48 | 12.29±1.9  | 9.28×10 <sup>-1</sup>        | -1.92  | 9.98×10 <sup>-1</sup> | -3.88  | 9.98×10 <sup>-1</sup>       |
| PC(0-36:3)  | 4.41±1.08   | 4.20±1.20   | 4.12±0.67  | 3.91±0.72  | 4.54×10 <sup>-1</sup>        | -4.93  | 9.55×10 <sup>-1</sup> | -5.03  | 8.25×10 <sup>-1</sup>       |
| PC(0-36:2)  | 2.09±0.50   | 1.86±0.54   | 1.89±0.45  | 1.68±0.35  | <b>4.54×10<sup>-2</sup></b>  | -10.85 | 5.38×10 <sup>-1</sup> | -10.64 | 6.26×10 <sup>-1</sup>       |
| PC(0-36:1)  | 0.27±0.12   | 0.26±0.10   | 0.22±0.08  | 0.26±0.11  | 5.52×10 <sup>-1</sup>        | -2.54  | 1.00×10 <sup>0</sup>  | 14.77  | 8.67×10 <sup>-1</sup>       |
| PC(0-36:0)  | 0.03±0.01   | 0.02±0.01   | 0.02±0.01  | 0.03±0.01  | 2.96×10 <sup>-7</sup>        | -8.55  | 9.11×10 <sup>-1</sup> | 15.14  | 4.94×10 <sup>-1</sup>       |
| PC(0-38:5)  | 10.11±1.95  | 10.06±2.5   | 9.75±1.79  | 9.49±1.73  | 7.57×10 <sup>-1</sup>        | -0.53  | 1.00×10 <sup>0</sup>  | -2.68  | 9.99×10 <sup>-1</sup>       |
| PC(0-38:4)  | 7.67±1.67   | 2.59±1.02   | 7.62±1.67  | 7.68±1.37  | 8.76×10 <sup>-1</sup>        | -2.62  | 9.81×10 <sup>-1</sup> | 0.86   | 1.00×10 <sup>0</sup>        |
| PC(0-40:7)  | 1.53±0.37   | 1.60±0.5    | 1.53±0.43  | 1.43±0.25  | 7.65×10 <sup>-1</sup>        | 4.60   | 1.00×10 <sup>0</sup>  | -6.94  | 9.98×10 <sup>-1</sup>       |

|             |              |             |             |              |                             |        |                       |        |                       |
|-------------|--------------|-------------|-------------|--------------|-----------------------------|--------|-----------------------|--------|-----------------------|
| PC(O-40:6)  | 1.43±0.38    | 1.46±0.32   | 0.54±0.16   | 0.44±0.10    | 3.63×10 <sup>-1</sup>       | 2.02   | 1.00×10 <sup>0</sup>  | -1.13  | 9.99×10 <sup>-1</sup> |
| PC(O-40:5)  | 2.89±0.58    | 2.88±0.80   | 2.88±0.58   | 2.94±0.54    | 8.92×10 <sup>-1</sup>       | -0.51  | 9.96×10 <sup>-1</sup> | 2.14   | 1.00×10 <sup>0</sup>  |
| Total PC(P) | 27.19±5.59   | 27.32±7.22  | 26.93±5.35  | 25.71±3.36   | 8.75×10 <sup>-1</sup>       | 0.50   | 1.00×10 <sup>0</sup>  | -4.60  | 9.99×10 <sup>-1</sup> |
| PC(P-32:1)  | 0.15±0.04    | 0.16±0.05   | 0.13±0.03   | 0.14±0.03    | 3.68×10 <sup>-1</sup>       | 4.48   | 1.00×10 <sup>0</sup>  | 7.79   | 9.68×10 <sup>-1</sup> |
| PC (P-32:0) | 1.13±0.24    | 1.10±0.27   | 1.08±0.22   | 1.13±0.24    | 9.14×10 <sup>-1</sup>       | -2.43  | 9.88×10 <sup>-1</sup> | 5.03   | 9.93×10 <sup>-1</sup> |
| PC(P-34:3)  | 0.02±0.01    | 0.02±0.004  | 0.02±0.005  | 0.02±0.01    | <b>1.17×10<sup>-2</sup></b> | -10.68 | 8.67×10 <sup>-1</sup> | 23.25  | 5.17×10 <sup>-1</sup> |
| PC(P-34:2)  | 5.81±1.26    | 5.31±1.32   | 5.21±1.13   | 4.85±1.05    | 6.55×10 <sup>-2</sup>       | -8.60  | 5.23×10 <sup>-1</sup> | -7.04  | 9.03×10 <sup>-1</sup> |
| PC(P-34:1)  | 1.70±0.34    | 1.62±0.37   | 1.54±0.33   | 1.44±0.29    | 7.19×10 <sup>-2</sup>       | -4.69  | 9.86×10 <sup>-1</sup> | -6.55  | 8.95×10 <sup>-1</sup> |
| PC(P-36:5)  | 0.16±0.09    | 0.18±0.09   | 0.16±0.08   | 0.21±0.10    | 6.07×10 <sup>-2</sup>       | 8.53   | 9.90×10 <sup>-1</sup> | 28.78  | 2.98×10 <sup>-1</sup> |
| PC(P-36:4)  | 7.49±1.60    | 7.84±2.10   | 7.68±1.71   | 7.55±1.03    | 9.93×10 <sup>-1</sup>       | 4.63   | 9.99×10 <sup>-1</sup> | -1.70  | 1.00×10 <sup>0</sup>  |
| PC(P-36:2)  | 1.83±0.49    | 1.75±0.60   | 1.71±0.47   | 1.50±0.28    | 2.01×10 <sup>-1</sup>       | -4.74  | 9.39×10 <sup>-1</sup> | -12.61 | 4.65×10 <sup>-1</sup> |
| PC(P-38:6)  | 0.49±0.15    | 0.55±0.24   | 0.52±0.16   | 0.48±0.10    | 9.87×10 <sup>-1</sup>       | 10.95  | 1.00×10 <sup>0</sup>  | -6.13  | 9.99×10 <sup>-1</sup> |
| PC(P-38:5)  | 3.78±0.84    | 4.05±1.12   | 3.90±0.80   | 3.75±0.46    | 9.87×10 <sup>-1</sup>       | 7.05   | 1.00×10 <sup>0</sup>  | -3.80  | 9.99×10 <sup>-1</sup> |
| PC(P-38:4)  | 2.42±0.66    | 2.59±1.02   | 2.68±0.81   | 2.52±0.43    | 7.65×10 <sup>-1</sup>       | 6.83   | 9.96×10 <sup>-1</sup> | -5.83  | 1.00×10 <sup>0</sup>  |
| PC(P-40:6)  | 0.52±0.19    | 0.52±0.24   | 0.54±0.16   | 0.44±0.10    | 3.41×10 <sup>-1</sup>       | 0.81   | 1.00×10 <sup>0</sup>  | -19.47 | 1.00×10 <sup>0</sup>  |
| PC(P-40:5)  | 1.62±0.42    | 1.59±0.62   | 1.71±0.49   | 1.62±0.26    | 6.95×10 <sup>-1</sup>       | -1.86  | 1.00×10 <sup>0</sup>  | -5.24  | 2.45×10 <sup>-1</sup> |
|             |              | 129.75±     | 174.57±     |              |                             |        |                       |        |                       |
| Total LPC   | 155.74±19.72 | 24.39       | 23.75       | 168.49±25.28 | 8.07×10 <sup>-7</sup>       | -16.69 | 2.67×10 <sup>-3</sup> | -3.48  | 9.75×10 <sup>-1</sup> |
| LPC 14:0    | 0.95±0.48    | 0.95±0.31   | 1.37±0.46   | 1.61±0.51    | 1.55×10 <sup>-6</sup>       | -0.43  | 9.88×10 <sup>-1</sup> | 17.15  | 5.67×10 <sup>-1</sup> |
| LPC 15:0    | 0.54±0.17    | 0.50±0.13   | 0.68±0.17   | 0.61±0.13    | 7.07×10 <sup>-4</sup>       | -8.17  | 9.91×10 <sup>-1</sup> | -10.07 | 5.23×10 <sup>-1</sup> |
| LPC 16:1    | 1.83±0.45    | 1.72±0.49   | 2.33±0.51   | 2.53±0.57    | 1.88×10 <sup>-6</sup>       | -6.24  | 9.84×10 <sup>-1</sup> | 8.91   | 7.39×10 <sup>-1</sup> |
| LPC 16:0    | 83.14±10.78  | 72.87±12.73 | 99.19±14.89 | 99.7±16.66   | 2.06×10 <sup>-8</sup>       | -12.35 | 3.27×10 <sup>-2</sup> | 0.51   | 1.00×10 <sup>0</sup>  |
| LPC 17:1    | 0.24±0.05    | 0.21±0.05   | 0.29±0.06   | 0.28±0.07    | 2.17×10 <sup>-5</sup>       | -12.07 | 6.44×10 <sup>-2</sup> | -5.01  | 9.03×10 <sup>-1</sup> |

|          |            |            |            |            |                             |        |                             |        |                             |
|----------|------------|------------|------------|------------|-----------------------------|--------|-----------------------------|--------|-----------------------------|
| LPC 17:0 | 0.91±0.22  | 0.82±0.26  | 1.12±0.31  | 0.94±0.24  | 1.45×10 <sup>-3</sup>       | -10.17 | 5.08×10 <sup>-1</sup>       | -16.41 | 9.30×10 <sup>-2</sup>       |
| LPC 18:3 | 0.38±0.15  | 0.28±0.11  | 0.36±0.12  | 0.37±0.11  | 2.16×10 <sup>-2</sup>       | -25.82 | 6.79×10 <sup>-2</sup>       | 3.92   | 9.98×10 <sup>-1</sup>       |
| LPC 18:2 | 28.16±6.79 | 19.35±5.84 | 24±5.6     | 19.61±3.48 | <b>8.07×10<sup>-7</sup></b> | -31.29 | <b>1.08×10<sup>-4</sup></b> | -18.14 | <b>2.02×10<sup>-2</sup></b> |
| LPC 18:1 | 13.66±2.53 | 10.11±2.4  | 13.69±2.51 | 11.76±1.69 | <b>2.39×10<sup>-6</sup></b> | -26.01 | <b>9.91×10<sup>-5</sup></b> | -14.13 | <b>2.02×10<sup>-2</sup></b> |
| LPC 18:0 | 18.25±2.74 | 16.23±3.66 | 22.82±3.99 | 22.77±4.36 | <b>5.54×10<sup>-8</sup></b> | -11.07 | 1.58×10 <sup>-1</sup>       | -0.19  | 9.98×10 <sup>-1</sup>       |
| LPC 20:5 | 0.17±0.08  | 0.15±0.07  | 0.19±0.09  | 0.23±0.09  | <b>8.52×10<sup>-4</sup></b> | -12.77 | 8.47×10 <sup>-1</sup>       | 19.39  | 5.82×10 <sup>-1</sup>       |
| LPC 20:4 | 4.20±0.70  | 3.68±1.04  | 4.71±1.08  | 4.27±0.94  | <b>1.13×10<sup>-2</sup></b> | -12.38 | 1.66×10 <sup>-1</sup>       | -9.36  | 5.23×10 <sup>-1</sup>       |
| LPC 20:3 | 1.46±0.34  | 1.29±0.34  | 1.7±0.29   | 1.86±0.39  | <b>3.00×10<sup>-6</sup></b> | -11.49 | 3.09×10 <sup>-1</sup>       | 9.42   | 6.11×10 <sup>-1</sup>       |
| LPC 20:2 | 0.22±0.05  | 0.17±0.04  | 0.23±0.04  | 0.2±0.05   | <b>7.58×10<sup>-5</sup></b> | -23.15 | <b>4.40×10<sup>-3</sup></b> | -14.69 | <b>3.47×10<sup>-2</sup></b> |
| LPC 20:1 | 0.16±0.05  | 0.12±0.03  | 0.16±0.04  | 0.13±0.03  | <b>7.28×10<sup>-5</sup></b> | -22.88 | <b>6.67×10<sup>-3</sup></b> | -22.27 | <b>4.40×10<sup>-3</sup></b> |
| LPC 20:0 | 0.09±0.03  | 0.07±0.02  | 0.1±0.02   | 0.08±0.02  | <b>1.33×10<sup>-5</sup></b> | -27.66 | <b>7.33×10<sup>-4</sup></b> | -18.36 | <b>2.28×10<sup>-2</sup></b> |
| LPC 22:6 | 0.88±0.18  | 0.83±0.3   | 1.1±0.35   | 1.01±0.20  | <b>3.22×10<sup>-3</sup></b> | -5.46  | 8.02×10 <sup>-1</sup>       | -8.28  | 1.00×10 <sup>0</sup>        |
| LPC 22:5 | 0.39±0.06  | 0.32±0.08  | 0.47±0.1   | 0.46±0.08  | <b>3.02×10<sup>-6</sup></b> | -16.89 | <b>4.13×10<sup>-2</sup></b> | -2.17  | 1.00×10 <sup>0</sup>        |
| LPC 22:1 | 0.01±0.01  | 0.01±0.002 | 0.01±0.01  | 0.01±0.002 | <b>1.32×10<sup>-3</sup></b> | -24.53 | 8.39×10 <sup>-2</sup>       | -30.10 | <b>1.38×10<sup>-2</sup></b> |
| LPC 22:0 | 0.03±0.01  | 0.02±0.01  | 0.02±0.01  | 0.02±0.01  | 1.61×10 <sup>-1</sup>       | -20.98 | 4.24×10 <sup>-1</sup>       | -12.98 | 7.25×10 <sup>-1</sup>       |
| LPC 24:0 | 0.06±0.02  | 0.04±0.01  | 0.06±0.02  | 0.05±0.01  | <b>3.73×10<sup>-3</sup></b> | -21.73 | <b>3.27×10<sup>-2</sup></b> | -6.68  | 9.26×10 <sup>-1</sup>       |
| LPC 26:0 | 0.01±0.004 | 0.01±0.003 | 0.01±0.01  | 0.01±0.004 | <b>5.39×10<sup>-3</sup></b> | -24.44 | <b>1.14×10<sup>-1</sup></b> | -16.77 | 3.45×10 <sup>-1</sup>       |
| Total PE | 13.56±4.44 | 12.35±5.19 | 21.36±5.15 | 23.01±8.22 | <b>2.21×10<sup>-9</sup></b> | -8.89  | 3.10×10 <sup>-1</sup>       | 7.72   | 4.70×10 <sup>-1</sup>       |
| PE 34:3  | 0.04±0.02  | 0.03±0.02  | 0.05±0.03  | 0.07±0.04  | <b>4.32×10<sup>-5</sup></b> | -16.35 | 8.67×10 <sup>-1</sup>       | 42.11  | 1.31×10 <sup>-1</sup>       |
| PE 34:2  | 0.88±0.27  | 0.75±0.35  | 1.23±0.46  | 1.49±0.63  | <b>2.10×10<sup>-7</sup></b> | -14.76 | 5.23×10 <sup>-1</sup>       | 20.82  | 2.87×10 <sup>-1</sup>       |
| PE 34:1  | 0.33±0.12  | 0.27±0.11  | 0.45±0.19  | 0.59±0.25  | <b>9.51×10<sup>-8</sup></b> | -17.05 | 3.33×10 <sup>-1</sup>       | 33.25  | <b>3.47×10<sup>-2</sup></b> |
| PE 35:2  | 0.05±0.02  | 0.04±0.02  | 0.06±0.02  | 0.06±0.03  | <b>1.82×10<sup>-2</sup></b> | -13.92 | 9.11×10 <sup>-1</sup>       | -3.04  | 9.72×10 <sup>-1</sup>       |
| PE 35:1  | 0.04±0.02  | 0.03±0.02  | 0.04±0.02  | 0.05±0.03  | <b>7.86×10<sup>-3</sup></b> | -25.21 | 2.55×10 <sup>-1</sup>       | 13.76  | 9.32×10 <sup>-1</sup>       |

|             |           |           |           |           |                              |        |                       |        |                             |
|-------------|-----------|-----------|-----------|-----------|------------------------------|--------|-----------------------|--------|-----------------------------|
| PE 36:5     | 0.04±0.02 | 0.02±0.01 | 0.04±0.02 | 0.06±0.04 | <b>4.05×10<sup>-4</sup></b>  | -32.17 | 3.33×10 <sup>-1</sup> | 37.93  | 5.38×10 <sup>-1</sup>       |
| PE 36:4     | 1.13±0.33 | 1.01±0.43 | 1.62±0.35 | 1.64±0.57 | <b>8.49×10<sup>-7</sup></b>  | -10.28 | 7.39×10 <sup>-1</sup> | 1.41   | 1.00×10 <sup>0</sup>        |
| PE 36:3     | 0.77±0.25 | 0.59±0.23 | 1.01±0.34 | 0.99±0.40 | <b>1.22×10<sup>-5</sup></b>  | -23.64 | 6.44×10 <sup>-2</sup> | -2.59  | 9.94×10 <sup>-1</sup>       |
| PE 36:2     | 2.76±0.93 | 2.41±1.00 | 4.24±1.45 | 5.06±2.26 | <b>6.60×10<sup>-9</sup></b>  | -12.65 | 8.14×10 <sup>-1</sup> | 19.36  | 3.97×10 <sup>-1</sup>       |
| PE 36:1     | 0.41±0.12 | 0.37±0.13 | 0.62±0.3  | 0.85±0.51 | <b>3.09×10<sup>-9</sup></b>  | -10.53 | 8.86×10 <sup>-1</sup> | 36.86  | 1.44×10 <sup>-1</sup>       |
| PE 38:6     | 1.36±0.65 | 1.29±0.72 | 2.16±0.63 | 21.9±0.94 | <b>1.95×10<sup>-6</sup></b>  | -4.97  | 9.98×10 <sup>-1</sup> | 1.38   | 1.00×10 <sup>0</sup>        |
| PE 38:5     | 0.92±0.38 | 0.76±0.34 | 1.38±0.35 | 1.28±0.47 | <b>2.09×10<sup>-6</sup></b>  | -17.25 | 7.65×10 <sup>-1</sup> | -7.03  | 8.25×10 <sup>-1</sup>       |
| PE 38:4     | 3.17±1.07 | 3.05±1.36 | 5.28±1.11 | 5.13±1.67 | <b>1.46×10<sup>-8</sup></b>  | -3.66  | 9.96×10 <sup>-1</sup> | -2.88  | 9.81×10 <sup>-1</sup>       |
| PE 38:3     | 0.62±0.22 | 0.61±0.28 | 1.07±0.27 | 1.16±0.43 | <b>1.60×10<sup>-9</sup></b>  | -1.95  | 9.94×10 <sup>-1</sup> | 8.67   | 9.39×10 <sup>-1</sup>       |
| PE 40:7     | 0.12±0.07 | 0.11±0.06 | 0.18±0.06 | 0.15±0.06 | <b>1.25×10<sup>-4</sup></b>  | -12.87 | 9.45×10 <sup>-1</sup> | -17.06 | 3.58×10 <sup>-1</sup>       |
| PE 40:6     | 0.65±0.33 | 0.73±0.36 | 1.37±0.54 | 1.58±0.63 | <b>1.11×10<sup>-9</sup></b>  | 11.69  | 9.79×10 <sup>-1</sup> | 14.94  | 7.90×10 <sup>-1</sup>       |
| PE 40:5     | 0.29±0.13 | 0.28±0.15 | 0.57±0.2  | 0.68±0.29 | <b>6.44×10<sup>-10</sup></b> | -0.19  | 1.00×10 <sup>0</sup>  | 19.53  | 6.97×10 <sup>-1</sup>       |
| Total PE(0) | 3.08±0.98 | 2.74±1.05 | 3.4±0.85  | 2.81±0.56 | <b>3.20×10<sup>-2</sup></b>  | -11.10 | 1.50×10 <sup>-1</sup> | -17.18 | <b>2.00×10<sup>-2</sup></b> |
| PE(0-34:2)  | 0.11±0.04 | 0.09±0.04 | 0.12±0.04 | 0.09±0.03 | <b>1.78×10<sup>-2</sup></b>  | -20.52 | 2.45×10 <sup>-1</sup> | -24.31 | 6.79×10 <sup>-1</sup>       |
| PE(0-34:1)  | 0.13±0.05 | 0.11±0.04 | 0.14±0.05 | 0.11±0.03 | 1.34×10 <sup>-1</sup>        | -14.61 | 7.25×10 <sup>-1</sup> | -18.90 | 2.55×10 <sup>-1</sup>       |
| PE(0-36:6)  | 0.02±0.01 | 0.02±0.01 | 0.02±0.02 | 0.03±0.02 | 1.96×10 <sup>-1</sup>        | -19.03 | 9.32×10 <sup>-1</sup> | 19.88  | 7.39×10 <sup>-1</sup>       |
| PE(0-36:5)  | 0.03±0.01 | 0.02±0.02 | 0.04±0.03 | 0.03±0.02 | 1.90×10 <sup>-1</sup>        | -19.60 | 4.10×10 <sup>-1</sup> | -23.66 | 9.86×10 <sup>-1</sup>       |
| PE(0-36:4)  | 0.76±0.24 | 0.85±0.24 | 0.70±0.33 | 0.66±0.17 | <b>2.18×10<sup>-2</sup></b>  | -8.57  | 5.52×10 <sup>-1</sup> | -22.43 | <b>1.78×10<sup>-2</sup></b> |
| PE(0-36:3)  | 0.17±0.05 | 0.18±0.05 | 0.14±0.06 | 0.14±0.04 | <b>2.13×10<sup>-2</sup></b>  | -15.73 | 3.45×10 <sup>-1</sup> | -20.22 | 9.30×10 <sup>-1</sup>       |
| PE(0-36:2)  | 0.16±0.06 | 0.14±0.05 | 0.18±0.06 | 0.15±0.04 | 1.15×10 <sup>-1</sup>        | -15.39 | 6.69×10 <sup>-1</sup> | -16.91 | 4.37×10 <sup>-1</sup>       |
| PE(0-38:5)  | 0.61±0.20 | 0.66±0.17 | 0.54±0.21 | 0.57±0.13 | 1.49×10 <sup>-1</sup>        | -11.09 | 9.11×10 <sup>-1</sup> | -13.93 | 3.45×10 <sup>-1</sup>       |
| PE(0-38:4)  | 0.73±0.33 | 0.82±0.29 | 0.65±0.30 | 0.66±0.18 | 1.51×10 <sup>-1</sup>        | -10.52 | 9.50×10 <sup>-1</sup> | -16.61 | 6.40×10 <sup>-1</sup>       |
| PE(0-40:7)  | 0.16±0.06 | 0.16±0.05 | 0.16±0.05 | 0.14±0.03 | 5.41×10 <sup>-1</sup>        | -4.11  | 1.00×10 <sup>0</sup>  | -9.94  | 7.52×10 <sup>-1</sup>       |

|             |             |             |           |              |                              |        |                             |        |                             |
|-------------|-------------|-------------|-----------|--------------|------------------------------|--------|-----------------------------|--------|-----------------------------|
| PE(O-40:6)  | 0.08±0.02   | 0.06±0.03   | 0.08±0.02 | 0.08±0.03    | <b>1.90×10<sup>-2</sup></b>  | -17.09 | 1.25×10 <sup>-1</sup>       | -9.55  | 8.77×10 <sup>-1</sup>       |
| PE(O-40:5)  | 0.13±0.05   | 0.16±0.05   | 0.12±0.05 | 0.15±0.05    | <b>8.87×10<sup>-3</sup></b>  | -7.99  | 9.50×10 <sup>-1</sup>       | -10.21 | 8.14×10 <sup>-1</sup>       |
| Total PE(P) | 3.60±1.13   | 3.90±1.02   | 3.59±1.11 | 3.68±0.63    | 3.78×10 <sup>-1</sup>        | -0.45  | 1.00×10 <sup>0</sup>        | -5.63  | 9.93×10 <sup>-1</sup>       |
| PE(P-34:2)  | 0.14±0.05   | 0.13±0.04   | 0.13±0.04 | 0.13±0.04    | 9.28×10 <sup>-1</sup>        | -2.64  | 9.99×10 <sup>-1</sup>       | -4.09  | 1.00×10 <sup>0</sup>        |
| PE(P-34:1)  | 0.07±0.02   | 0.06±0.01   | 0.06±0.03 | 0.06±0.02    | 6.16×10 <sup>-1</sup>        | -11.34 | 6.97×10 <sup>-1</sup>       | -2.73  | 9.99×10 <sup>-1</sup>       |
| PE(P-36:4)  | 0.47±0.19   | 0.47±0.16   | 0.48±0.18 | 0.49±0.10    | 4.08×10 <sup>-1</sup>        | 1.85   | 9.98×10 <sup>-1</sup>       | 4.01   | 7.52×10 <sup>-1</sup>       |
| PE(P-36:2)  | 0.29±0.11   | 0.30±0.09   | 0.27±0.10 | 0.27±0.08    | 6.09×10 <sup>-1</sup>        | -8.49  | 9.75×10 <sup>-1</sup>       | -9.87  | 9.26×10 <sup>-1</sup>       |
| PE(P-36:1)  | 0.05±0.02   | 0.05±0.03   | 0.05±0.02 | 0.06±0.01    | 5.52×10 <sup>-1</sup>        | 1.07   | 1.00×10 <sup>0</sup>        | 1.76   | 9.72×10 <sup>-1</sup>       |
| PE(P-38:6)  | 0.25±0.07   | 0.27±0.09   | 0.27±0.09 | 0.29±0.06    | 1.53×10 <sup>-1</sup>        | 7.55   | 9.93×10 <sup>-1</sup>       | 8.20   | 6.40×10 <sup>-1</sup>       |
| PE(P-38:5)  | 0.98±0.29   | 1.09±0.27   | 0.98±0.29 | 0.98±0.15    | 3.05×10 <sup>-1</sup>        | -0.36  | 1.00×10 <sup>0</sup>        | -9.30  | 7.25×10 <sup>-1</sup>       |
| PE(P-38:4)  | 0.74±0.32   | 0.83±0.28   | 0.77±0.30 | 0.77±0.18    | 3.78×10 <sup>-1</sup>        | 3.20   | 9.94×10 <sup>-1</sup>       | -7.22  | 9.97×10 <sup>-1</sup>       |
| PE(P-40:6)  | 0.22±0.08   | 0.24±0.09   | 0.22±0.08 | 0.24±0.06    | 4.33×10 <sup>-1</sup>        | -2.68  | 9.94×10 <sup>-1</sup>       | -2.18  | 1.00×10 <sup>0</sup>        |
| PE(P-40:5)  | 0.33±0.10   | 0.39±0.12   | 0.32±0.10 | 0.34±0.09    | 9.19×10 <sup>-1</sup>        | -4.98  | 9.95×10 <sup>-1</sup>       | -11.32 | 7.11×10 <sup>-1</sup>       |
| PE(P-40:4)  | 0.05±0.03   | 0.06±0.03   | 0.05±0.02 | 0.04±0.03    | 2.64×10 <sup>-1</sup>        | -12.10 | 9.99×10 <sup>-1</sup>       | -26.18 | 2.16×10 <sup>-1</sup>       |
| Total LPE   | 14.22±3.22  | 10.12±3.13  | 14.58±2.8 | 13.56±2.53   | 6.81×10 <sup>-6</sup>        | -28.84 | 2.77×10 <sup>-4</sup>       | -7.02  | 8.57×10 <sup>-1</sup>       |
| LPE 16:0    | 1.92±0.48   | 2.17±0.49   | 1.42±0.43 | 2.05±0.43    | 5.09×10 <sup>-6</sup>        | -26.02 | <b>4.40×10<sup>-3</sup></b> | -5.56  | 9.93×10 <sup>-1</sup>       |
| LPE 18:2    | 4.99±1.54   | 4.36±1.28   | 3.23±1.33 | 4.12±1.22    | 7.96×10 <sup>-5</sup>        | -35.18 | <b>3.01×10<sup>-4</sup></b> | -5.51  | 9.81×10 <sup>-1</sup>       |
| LPE 18:1    | 2.45±0.76   | 2.19±0.67   | 1.51±0.69 | 2.06±0.67    | <b>6.81×10<sup>-6</sup></b>  | -38.28 | <b>1.18×10<sup>-4</sup></b> | -5.95  | 9.32×10 <sup>-1</sup>       |
| LPE 18:0    | 2.72±0.61   | 3.48±0.62   | 2.13±0.56 | 3.22±0.61    | <b>1.18×10<sup>-8</sup></b>  | -21.84 | <b>9.98×10<sup>-3</sup></b> | -7.47  | 7.65×10 <sup>-1</sup>       |
| LPE 20:4    | 1.33±0.32   | 1.42±0.24   | 1.10±0.30 | 1.21±0.18    | <b>7.05×10<sup>-4</sup></b>  | -17.65 | 7.96×10 <sup>-2</sup>       | -14.47 | 9.34×10 <sup>-3</sup>       |
| LPE 22:6    | 0.81±0.15   | 0.96±0.31   | 0.73±0.25 | 0.90±0.19    | <b>1.62×10<sup>-2</sup></b>  | -9.76  | 6.62×10 <sup>-1</sup>       | -6.99  | 1.00×10 <sup>0</sup>        |
|             |             |             | 125.41±   |              |                              |        |                             |        |                             |
| Total PI    | 96.47±14.25 | 89.48±20.28 | 28.25     | 143.31±21.89 | <b>1.62×10<sup>-10</sup></b> | -7.24  | 1.10×10 <sup>-1</sup>       | 14.27  | <b>6.00×10<sup>-3</sup></b> |

|           |            |            |            |            |                              |        |                             |        |                             |
|-----------|------------|------------|------------|------------|------------------------------|--------|-----------------------------|--------|-----------------------------|
| PI 32:1   | 0.48±0.28  | 0.51±0.22  | 0.74±0.49  | 1.82±1.11  | <b>2.73×10<sup>-10</sup></b> | 6.66   | 9.55×10 <sup>-1</sup>       | 147.11 | <b>8.14×10<sup>-6</sup></b> |
| PI 32:0   | 0.34±0.14  | 0.31±0.12  | 0.47±0.26  | 1.01±0.59  | <b>5.71×10<sup>-9</sup></b>  | -9.40  | 9.39×10 <sup>-1</sup>       | 112.29 | <b>3.85×10<sup>-1</sup></b> |
| PI 34:1   | 6.24±1.57  | 5.16±1.48  | 7.97±2.75  | 10.8±3.22  | <b>9.79×10<sup>-10</sup></b> | -17.29 | 5.17×10 <sup>-2</sup>       | 35.39  | <b>7.64×10<sup>-1</sup></b> |
| PI 34:0   | 0.13±0.06  | 0.1±0.05   | 0.17±0.07  | 0.28±0.12  | <b>4.26×10<sup>-8</sup></b>  | -18.36 | 8.36×10 <sup>-1</sup>       | 66.00  | <b>3.08×10<sup>-1</sup></b> |
| PI 36:4   | 6.60±1.80  | 5.93±1.86  | 9.13±2.33  | 10.98±2.67 | <b>2.35×10<sup>-10</sup></b> | -10.19 | 5.82×10 <sup>-1</sup>       | 20.25  | 6.44×10 <sup>-2</sup>       |
| PI 36:3   | 6.03±1.39  | 4.65±1.77  | 7.09±2.36  | 7.15±1.53  | <b>8.21×10<sup>-7</sup></b>  | -22.98 | <b>2.48×10<sup>-3</sup></b> | 0.89   | 9.96×10 <sup>-1</sup>       |
| PI 36:2   | 24.52±4.37 | 22.55±6.01 | 29.78±8.61 | 33.92±6.54 | <b>1.49×10<sup>-7</sup></b>  | -8.03  | 6.26×10 <sup>-1</sup>       | 13.91  | 1.03×10 <sup>-1</sup>       |
| PI 36:1   | 5.78±1.60  | 4.71±1.75  | 6.86±2.7   | 7.62±2.16  | <b>2.63×10<sup>-5</sup></b>  | -18.60 | <b>3.47×10<sup>-2</sup></b> | 11.12  | 7.52×10 <sup>-1</sup>       |
| PI 38:6   | 0.86±0.30  | 0.71±0.30  | 1.06±0.39  | 1.11±0.28  | <b>3.11×10<sup>-5</sup></b>  | -17.80 | 2.07×10 <sup>-1</sup>       | 4.72   | 8.67×10 <sup>-1</sup>       |
| PI 38:5   | 2.28±0.54  | 1.8±0.46   | 2.73±0.85  | 2.84±0.63  | <b>1.46×10<sup>-6</sup></b>  | -21.06 | <b>1.21×10<sup>-2</sup></b> | 4.29   | 9.72×10 <sup>-1</sup>       |
| PI 38:4   | 33.54±4.83 | 33.67±7.55 | 46.11±9.64 | 50.02±8.96 | <b>3.73×10<sup>-10</sup></b> | 0.40   | 9.99×10 <sup>-1</sup>       | 8.49   | 5.82×10 <sup>-1</sup>       |
| PI 38:3   | 6.62±2.14  | 6.42±1.61  | 9.01±1.98  | 11±2.73    | <b>4.73×10<sup>-10</sup></b> | -3.11  | 1.00×10 <sup>0</sup>        | 22.14  | <b>1.30×10<sup>-2</sup></b> |
| PI 38:2   | 0.42±0.15  | 0.39±0.14  | 0.61±0.17  | 0.55±0.17  | <b>1.08×10<sup>-5</sup></b>  | -7.79  | 9.88×10 <sup>-1</sup>       | -9.77  | 8.02×10 <sup>-1</sup>       |
| PI 40:6   | 1.21±0.37  | 1.21±0.42  | 1.69±0.17  | 1.79±0.45  | <b>5.29×10<sup>-6</sup></b>  | -0.56  | 1.00×10 <sup>0</sup>        | 6.04   | 8.77×10 <sup>-1</sup>       |
| PI 40:5   | 0.95±0.19  | 0.94±0.24  | 1.34±0.35  | 1.68±0.47  | <b>8.23×10<sup>-10</sup></b> | -1.16  | 9.91×10 <sup>-1</sup>       | 25.18  | 6.44×10 <sup>-1</sup>       |
| PI 40:4   | 0.46±0.13  | 0.43±0.13  | 0.66±0.15  | 0.73±0.17  | <b>1.65×10<sup>-9</sup></b>  | -5.79  | 8.14×10 <sup>-1</sup>       | 11.13  | 5.82×10 <sup>-1</sup>       |
| Total LPI | 3.48±0.77  | 3.21±0.58  | 3.99±0.82  | 4.59±1.14  | <b>4.17×10<sup>-6</sup></b>  | -7.53  | 1.70×10 <sup>-1</sup>       | 15.12  | <b>4.70×10<sup>-2</sup></b> |
| LPI 18:2  | 1.07±0.30  | 1.09±0.32  | 0.91±0.24  | 1.34±0.45  | <b>1.87×10<sup>-3</sup></b>  | -15.55 | 3.21×10 <sup>-1</sup>       | 23.06  | 1.98×10 <sup>-1</sup>       |
| LPI 18:1  | 0.52±0.16  | 0.57±0.23  | 0.45±0.13  | 0.66±0.35  | <b>3.96×10<sup>-2</sup></b>  | -14.42 | 4.51×10 <sup>-1</sup>       | 15.14  | 9.84×10 <sup>-1</sup>       |
| LPI 18:0  | 0.85±0.29  | 1.14±0.24  | 0.90±0.19  | 1.26±0.29  | <b>1.16×10<sup>-6</sup></b>  | 5.02   | 9.50×10 <sup>-1</sup>       | 10.30  | 5.96×10 <sup>-1</sup>       |
| LPI 20:4  | 1.03±0.29  | 1.19±0.27  | 0.97±0.22  | 1.34±0.38  | <b>3.15×10<sup>-4</sup></b>  | -6.09  | 9.84×10 <sup>-1</sup>       | 12.44  | 4.80×10 <sup>-1</sup>       |
| Total PS  | 0.63±0.24  | 0.62±0.22  | 0.64±0.23  | 0.65±0.24  | 9.84×10 <sup>-1</sup>        | -1.24  | 9.90×10 <sup>-1</sup>       | 1.66   | 7.60×10 <sup>-1</sup>       |
| PS 36:2   | 0.04±0.01  | 0.04±0.02  | 0.04±0.02  | 0.05±0.02  | <b>4.38×10<sup>-2</sup></b>  | 6.24   | 9.90×10 <sup>-1</sup>       | 17.58  | 6.26×10 <sup>-1</sup>       |

|          |              |             |             |              |                              |        |                             |        |                             |
|----------|--------------|-------------|-------------|--------------|------------------------------|--------|-----------------------------|--------|-----------------------------|
| PS 36:1  | 0.24±0.10    | 0.23±0.08   | 0.24±0.09   | 0.24±0.09    | 9.87×10 <sup>-1</sup>        | -2.79  | 1.00×10 <sup>0</sup>        | 2.92   | 1.00×10 <sup>0</sup>        |
| PS 38:4  | 0.23±0.10    | 0.22±0.10   | 0.22±0.11   | 0.20±0.09    | 9.28×10 <sup>-1</sup>        | -5.15  | 9.94×10 <sup>-1</sup>       | -8.90  | 9.99×10 <sup>-1</sup>       |
| PS 38:3  | 0.06±0.03    | 0.06±0.02   | 0.06±0.03   | 0.07±0.03    | 7.32×10 <sup>-1</sup>        | -5.06  | 9.72×10 <sup>-1</sup>       | 16.28  | 9.03×10 <sup>-1</sup>       |
| PS 40:6  | 0.04±0.02    | 0.04±0.02   | 0.04±0.02   | 0.04±0.03    | 6.24×10 <sup>-1</sup>        | 24.28  | 8.36×10 <sup>-1</sup>       | 16.40  | 9.68×10 <sup>-1</sup>       |
| PS 40:5  | 0.03±0.02    | 0.03±0.02   | 0.04±0.02   | 0.04±0.03    | 2.98×10 <sup>-1</sup>        | 10.25  | 1.00×10 <sup>0</sup>        | 0.14   | 1.00×10 <sup>0</sup>        |
| Total PG | 0.09±0.03    | 0.14±0.05   | 0.07±0.05   | 0.19±0.09    | <b>3.95×10<sup>-8</sup></b>  | -18.35 | 3.97×10 <sup>-1</sup>       | 31.65  | 5.96×10 <sup>-1</sup>       |
| PG 34:1  | 0.02±0.02    | 0.04±0.02   | 0.02±0.02   | 0.04±0.02    | <b>8.90×10<sup>-6</sup></b>  | 4.53   | 1.00×10 <sup>0</sup>        | -13.17 | 9.32×10 <sup>-1</sup>       |
| PG 36:2  | 0.04±0.02    | 0.05±0.03   | 0.03±0.03   | 0.08±0.04    | <b>2.78×10<sup>-5</sup></b>  | -14.28 | 7.65×10 <sup>-1</sup>       | 46.81  | 1.51×10 <sup>-1</sup>       |
| PG 36:1  | 0.03±0.01    | 0.02±0.02   | 0.05±0.03   | 0.07±0.04    | <b>5.98×10<sup>-8</sup></b>  | -38.44 | <b>9.93×10<sup>-3</sup></b> | 55.65  | 1.25×10 <sup>-1</sup>       |
|          | 979.72±      | 961.45±     | 1197.35±    | 1481.38±     |                              |        |                             |        |                             |
| Total CE | 110.87       | 140.04      | 159.6       | 189.7        | <b>1.79×10<sup>-12</sup></b> | -1.87  | 3.00×10 <sup>-1</sup>       | 23.72  | <b>1.75×10<sup>-5</sup></b> |
| CE 14:0  | 5.96±2.32    | 5.69±1.88   | 8.1±2.47    | 11.9±5.30    | <b>1.79×10<sup>-7</sup></b>  | -4.53  | 1.00×10 <sup>0</sup>        | 46.94  | <b>3.90×10<sup>-2</sup></b> |
| CE 15:0  | 4.70±1.60    | 4.5±1.37    | 5.85±1.55   | 6.95±2.52    | <b>7.76×10<sup>-5</sup></b>  | -4.16  | 1.00×10 <sup>0</sup>        | 18.95  | 5.67×10 <sup>-1</sup>       |
| CE 16:2  | 1.13±0.24    | 1.16±0.30   | 1,76±0.46   | 2.75±0.76    | <b>6.45×10<sup>-13</sup></b> | 3.12   | 9.99×10 <sup>-1</sup>       | 56.36  | <b>1.32×10<sup>-5</sup></b> |
| CE 16:1  | 36.49±14.36  | 38.21±11.09 | 47.89±13.95 | 80.49±32.52  | <b>1.30×10<sup>-9</sup></b>  | 4.71   | 9.03×10 <sup>-1</sup>       | 68.07  | <b>1.81×10<sup>-4</sup></b> |
|          |              |             | 423.25±     |              |                              |        |                             |        |                             |
| CE 16:0  | 344.8±34.05  | 345.4±50.85 | 58.49       | 514.88±53.49 | <b>3.12×10<sup>-12</sup></b> | 0.18   | 1.00×10 <sup>0</sup>        | 21.65  | <b>1.60×10<sup>-5</sup></b> |
| CE 17:1  | 16.53±2.46   | 16.19±2.67  | 19.68±2.71  | 24.74±3.21   | <b>1.27×10<sup>-11</sup></b> | -2.08  | 9.84×10 <sup>-1</sup>       | 25.68  | <b>1.09×10<sup>-5</sup></b> |
| CE 17:0  | 3.64±1.41    | 3.75±1.31   | 4.61±1.79   | 5.55±2.15    | <b>4.57×10<sup>-4</sup></b>  | 2.97   | 9.91×10 <sup>-1</sup>       | 20.36  | 3.58×10 <sup>-1</sup>       |
| CE 18:3  | 17.67±6.90   | 17.72±5.04  | 25.63±10.78 | 41.79±15.48  | <b>8.85×10<sup>-11</sup></b> | 0.27   | 9.97×10 <sup>-1</sup>       | 63.05  | <b>2.54×10<sup>-4</sup></b> |
|          |              | 255.36±     | 298.94±     |              |                              |        |                             |        |                             |
| CE 18:2  | 269.64±29.37 | 31.99       | 37.21       | 342.87±35.76 | <b>9.76×10<sup>-11</sup></b> | -5.30  | 4.80×10 <sup>-1</sup>       | 14.70  | <b>7.93×10<sup>-4</sup></b> |
|          |              | 159.88±     | 207.74±     |              |                              |        |                             |        |                             |
| CE 18:1  | 172.07±29.37 | 27.03       | 34.43       | 252.73±49.58 | <b>8.85×10<sup>-11</sup></b> | -7.09  | 4.37×10 <sup>-1</sup>       | 21.66  | <b>5.82×10<sup>-3</sup></b> |

|              |              |             |             |              |                              |       |                       |        |                             |
|--------------|--------------|-------------|-------------|--------------|------------------------------|-------|-----------------------|--------|-----------------------------|
| CE 18:0      | 16.4±3.28    | 17.24±4.18  | 24.99±6.86  | 30.37±6.46   | <b>2.22×10<sup>-11</sup></b> | 5.11  | 9.79×10 <sup>-1</sup> | 21.53  | <b>4.37×10<sup>-2</sup></b> |
| CE 20:5      | 7.05±2.63    | 8.11±3.02   | 12.5±6.70   | 21.67±8.50   | <b>1.05×10<sup>-10</sup></b> | 15.03 | 6.26×10 <sup>-1</sup> | 73.43  | <b>3.01×10<sup>-4</sup></b> |
| CE 20:3      | 2.09±0.76    | 2.39±0.79   | 2.71±0.69   | 4.22±1.00    | <b>3.30×10<sup>-10</sup></b> | 14.20 | 3.97×10 <sup>-1</sup> | 55.84  | <b>1.63×10<sup>-6</sup></b> |
|              |              |             | 103.92±     |              |                              |       |                       |        |                             |
| CE 20:4      | 75.01±11.73  | 78.74±20.46 | 25.69       | 128.09±22.04 | <b>8.21×10<sup>-11</sup></b> | 4.98  | 9.72×10 <sup>-1</sup> | 23.26  | <b>1.07×10<sup>-2</sup></b> |
| CE 20:2      | 0.48±0.12    | 0.53±0.13   | 0.62±0.12   | 0.90±0.20    | <b>5.07×10<sup>-11</sup></b> | 11.06 | 3.97×10 <sup>-1</sup> | 44.81  | <b>6.69×10<sup>-6</sup></b> |
| CE 20:1      | 0.20±0.07    | 0.18±0.05   | 0.26±0.08   | 0.26±0.09    | <b>1.35×10<sup>-4</sup></b>  | -9.07 | 9.95×10 <sup>-1</sup> | -0.74  | 1.00×10 <sup>0</sup>        |
| CE 22:6      | 5.09±1.21    | 5.64±1.46   | 7.84±2.76   | 9.93±2.70    | <b>4.44×10<sup>-10</sup></b> | 10.89 | 5.67×10 <sup>-1</sup> | 26.53  | <b>3.90×10<sup>-2</sup></b> |
| CE 22:5      | 0.41±0.08    | 0.4±0.09    | 0.54±0.12   | 0.70±0.16    | <b>5.80×10<sup>-11</sup></b> | -1.67 | 1.00×10 <sup>0</sup>  | 28.45  | <b>3.82×10<sup>-3</sup></b> |
| CE 22:4      | 0.05±0.01    | 0.05±0.01   | 0.06±0.01   | 0.07±0.01    | <b>3.97×10<sup>-5</sup></b>  | -6.19 | 9.79×10 <sup>-1</sup> | 16.69  | 8.83×10 <sup>-2</sup>       |
| CE 22:1      | 0.05±0.03    | 0.05±0.02   | 0.07±0.05   | 0.07±0.03    | <b>5.60×10<sup>-3</sup></b>  | -6.75 | 1.00×10 <sup>0</sup>  | -3.84  | 1.00×10 <sup>0</sup>        |
| CE 22:0      | 0.11±0.05    | 0.11±0.03   | 0.16±0.07   | 0.19±0.08    | <b>2.19×10<sup>-6</sup></b>  | -1.10 | 9.79×10 <sup>-1</sup> | 20.40  | 3.21×10 <sup>-1</sup>       |
| CE 24:6      | 0.003±0.001  | 0.003±0.001 | 0.004±0.002 | 0.01±0.002   | <b>9.57×10<sup>-5</sup></b>  | 4.44  | 1.00×10 <sup>0</sup>  | 33.72  | 1.51×10 <sup>-1</sup>       |
| CE 24:1      | 0.05±0.02    | 0.05±0.01   | 0.07±0.05   | 0.07±0.02    | <b>5.31×10<sup>-5</sup></b>  | -7.58 | 9.93×10 <sup>-1</sup> | 4.36   | 1.00×10 <sup>0</sup>        |
| CE 24:0      | 0.09±0.04    | 0.09±0.02   | 0.14±0.06   | 0.16±0.07    | <b>1.82×10<sup>-8</sup></b>  | -7.09 | 1.00×10 <sup>0</sup>  | 13.20  | 6.83×10 <sup>-1</sup>       |
|              |              |             | 671.6±      |              |                              |       |                       |        |                             |
| COH          | 485.83±76.38 | 494.16±98.6 | 152.94      | 856.14±150.8 | <b>1.61×10<sup>-11</sup></b> | 1.71  | 9.99×10 <sup>-1</sup> | 27.48  | <b>2.48×10<sup>-3</sup></b> |
| Total DG     | 33.38±12.81  | 34.31±14.62 | 72.05±27.2  | 92.96±29.92  | <b>1.01×10<sup>-12</sup></b> | 2.78  | 9.20×10 <sup>-1</sup> | 29.01  | <b>9.00×10<sup>-3</sup></b> |
| DG 14:0/16:0 | 0.11±0.07    | 0.11±0.06   | 0.26±0.19   | 0.55±0.43    | <b>2.20×10<sup>-10</sup></b> | -0.82 | 1.00×10 <sup>0</sup>  | 110.07 | <b>7.14×10<sup>-3</sup></b> |
| DG 14:0/18:2 | 0.18±0.12    | 0.17±0.09   | 0.46±0.27   | 0.62±0.25    | <b>1.53×10<sup>-11</sup></b> | -7.82 | 1.00×10 <sup>0</sup>  | 32.75  | 1.14×10 <sup>-1</sup>       |
| DG 14:0/18:1 | 0.23±0.16    | 0.21±0.12   | 0.6±0.42    | 0.89±0.55    | <b>1.10×10<sup>-10</sup></b> | -7.26 | 1.00×10 <sup>0</sup>  | 49.24  | 1.31×10 <sup>-1</sup>       |
| DG 16:0/16:0 | 0.75±0.28    | 0.74±0.28   | 1.43±1.00   | 2.95±1.86    | <b>7.40×10<sup>-12</sup></b> | -1.41 | 1.00×10 <sup>0</sup>  | 106.86 | <b>2.15×10<sup>-4</sup></b> |
| DG 16:0/18:2 | 4.29±1.82    | 4.51±1.91   | 9.38±4.18   | 12.79±4.16   | <b>1.74×10<sup>-12</sup></b> | 4.99  | 9.79×10 <sup>-1</sup> | 36.28  | <b>1.38×10<sup>-2</sup></b> |

|                |              |              |               |               |                              |        |                       |        |                             |
|----------------|--------------|--------------|---------------|---------------|------------------------------|--------|-----------------------|--------|-----------------------------|
| DG 16:1/18:1   | 0.98±0.56    | 1.02±0.57    | 2.32±1.06     | 3.48±1.59     | <b>2.54×10<sup>-12</sup></b> | 3.49   | 1.00×10 <sup>0</sup>  | 50.00  | <b>7.64×10<sup>-3</sup></b> |
| DG 16:0/18:1   | 4.51±1.97    | 4.73±2.27    | 9.84±5.01     | 14.84±6.70    | <b>3.12×10<sup>-12</sup></b> | 4.91   | 1.00×10 <sup>0</sup>  | 50.76  | <b>5.07×10<sup>-3</sup></b> |
| DG 16:0/20:4   | 0.44±0.19    | 0.5±0.21     | 0.92±0.43     | 1.65±0.86     | <b>4.34×10<sup>-12</sup></b> | 12.79  | 8.47×10 <sup>-1</sup> | 79.88  | <b>4.91×10<sup>-4</sup></b> |
| DG 18:1/18:3   | 1.2±0.53     | 1.15±0.52    | 2.61±0.96     | 3.02±1.02     | <b>1.33×10<sup>-11</sup></b> | -4.11  | 1.00×10 <sup>0</sup>  | 15.40  | 6.69×10 <sup>-1</sup>       |
| DG 18:2/18:2   | 2.68±1.19    | 2.74±1.35    | 5.92±2.24     | 6.07±2.10     | <b>1.33×10<sup>-10</sup></b> | 2.19   | 1.00×10 <sup>0</sup>  | 2.48   | 9.99×10 <sup>-1</sup>       |
| DG 16:0/20:3   | 0.14±0.06    | 0.16±0.07    | 0.31±0.15     | 0.46±0.19     | <b>4.34×10<sup>-12</sup></b> | 11.66  | 9.55×10 <sup>-1</sup> | 48.90  | <b>1.38×10<sup>-2</sup></b> |
| DG 18:1/18:2   | 8.58±3.51    | 8.6±3.94     | 18.55±5.95    | 20.45±5.48    | <b>4.20×10<sup>-12</sup></b> | 0.12   | 1.00×10 <sup>0</sup>  | 10.26  | 6.97×10 <sup>-1</sup>       |
| DG 18:0/18:2   | 0.77±0.31    | 0.87±0.36    | 1.84±0.96     | 2.42±0.88     | <b>1.79×10<sup>-12</sup></b> | 11.85  | 9.39×10 <sup>-1</sup> | 31.76  | <b>3.90×10<sup>-2</sup></b> |
| DG 18:1/18:1   | 5.03±2.14    | 5.02±2.38    | 10.69±3.87    | 12.96±4.56    | <b>7.72×10<sup>-12</sup></b> | -0.10  | 1.00×10 <sup>0</sup>  | 21.24  | 3.71×10 <sup>-1</sup>       |
| DG 18:0/18:1   | 1.01±0.42    | 1.12±0.55    | 2.21±1.27     | 3.33±1.70     | <b>1.37×10<sup>-11</sup></b> | 11.19  | 9.96×10 <sup>-1</sup> | 50.61  | <b>1.47×10<sup>-2</sup></b> |
| DG 16:0/22:6   | 0.17±0.11    | 0.22±0.15    | 0.36±0.19     | 0.58±0.28     | <b>1.14×10<sup>-9</sup></b>  | 29.69  | 7.25×10 <sup>-1</sup> | 60.86  | <b>1.07×10<sup>-2</sup></b> |
| DG 16:0/22:5   | 0.16±0.07    | 0.17±0.08    | 0.34±0.14     | 0.49±0.21     | <b>1.12×10<sup>-11</sup></b> | 9.35   | 9.75×10 <sup>-1</sup> | 43.07  | <b>4.62×10<sup>-2</sup></b> |
| DG 18:1/20:4   | 1.41±0.50    | 1.56±0.64    | 2.76±1.00     | 3.91±1.57     | <b>1.37×10<sup>-11</sup></b> | 9.79   | 9.93×10 <sup>-1</sup> | 41.53  | <b>2.15×10<sup>-2</sup></b> |
| DG 18:0/20:4   | 0.33±0.11    | 0.34±0.12    | 0.49±0.17     | 0.62±0.20     | <b>5.98×10<sup>-8</sup></b>  | 3.73   | 1.00×10 <sup>0</sup>  | 27.04  | 1.38×10 <sup>-1</sup>       |
| DG 18:1/20:3   | 0.39±0.16    | 0.38±0.17    | 0.77±0.29     | 0.91±0.30     | <b>6.47×10<sup>-11</sup></b> | -2.09  | 1.00×10 <sup>0</sup>  | 17.84  | 5.08×10 <sup>-1</sup>       |
| Total TG       | 157.56±60.78 | 162.15±67.04 | 349.79±142.61 | 490.86±191.45 | <b>6.45×10<sup>-13</sup></b> | 2.91   | 8.50×10 <sup>-1</sup> | 40.33  | <b>2.00×10<sup>-3</sup></b> |
| TG             |              |              |               |               |                              |        |                       |        |                             |
| 14:0/16:1/18:2 | 0.58±0.45    | 0.41±0.23    | 1.49±1.03     | 2.15±1.33     | <b>6.45×10<sup>-11</sup></b> | -29.50 | 9.11×10 <sup>-1</sup> | 44.41  | 1.74×10 <sup>-1</sup>       |
| TG             |              |              |               |               |                              |        |                       |        |                             |
| 16:1/16:1/16:1 | 0.12±0.10    | 0.11±0.07    | 0.34±0.22     | 0.55±0.32     | <b>7.35×10<sup>-12</sup></b> | -7.98  | 1.00×10 <sup>0</sup>  | 60.79  | <b>2.58×10<sup>-2</sup></b> |
| TG             |              |              |               |               |                              |        |                       |        |                             |
| 14:0/16:0/18:2 | 1.18±1.06    | 1.02±0.6     | 2.97±2.54     | 5.99±4.14     | <b>5.47×10<sup>-11</sup></b> | -14.01 | 1.00×10 <sup>0</sup>  | 102.15 | <b>7.64×10<sup>-3</sup></b> |

|                |           |           |            |            |                              |        |                       |        |                             |  |
|----------------|-----------|-----------|------------|------------|------------------------------|--------|-----------------------|--------|-----------------------------|--|
| TG             |           |           |            |            |                              |        |                       |        |                             |  |
| 14:0/16:1/18:1 | 1.06±0.92 | 0.74±0.43 | 2.54±1.79  | 4.54±4.53  | <b>4.56×10<sup>-10</sup></b> | -29.60 | 9.79×10 <sup>-1</sup> | 78.81  | 1.90×10 <sup>-1</sup>       |  |
| TG             |           |           |            |            |                              |        |                       |        |                             |  |
| 14:1/16:0/18:1 | 0.21±0.20 | 0.16±0.08 | 0.43±0.35  | 0.98±1.01  | <b>3.26×10<sup>-10</sup></b> | -24.41 | 1.00×100              | 126.85 | <b>2.28×10<sup>-2</sup></b> |  |
| TG             |           |           |            |            |                              |        |                       |        |                             |  |
| 14:1/16:1/18:0 | 0.78±0.85 | 0.68±0.41 | 1.85±1.46  | 4.29±3.56  | <b>4.07×10<sup>-11</sup></b> | -12.75 | 9.91×10 <sup>-1</sup> | 132.09 | <b>1.99×10<sup>-1</sup></b> |  |
| TG             |           |           |            |            |                              |        |                       |        |                             |  |
| 14:0/16:0/18:1 | 1.68±1.53 | 1.41±0.92 | 4.24±3.41  | 8.52±6.66  | <b>5.62×10<sup>-10</sup></b> | -15.80 | 1.00×10 <sup>0</sup>  | 100.78 | <b>3.47×10<sup>-2</sup></b> |  |
| TG             |           |           |            |            |                              |        |                       |        |                             |  |
| 16:0/16:0/16:0 | 0.84±0.91 | 0.66±0.46 | 1.6±1.94   | 5.06±4.25  | <b>5.60×10<sup>-10</sup></b> | -21.60 | 9.94×10 <sup>-1</sup> | 216.75 | <b>2.77×10<sup>-4</sup></b> |  |
| TG             |           |           |            |            |                              |        |                       |        |                             |  |
| 15:0/16:0/18:1 | 0.20±0.13 | 0.17±0.12 | 0.44±0.34  | 0.84±0.65  | <b>2.21×10<sup>-9</sup></b>  | -10.76 | 9.98×10 <sup>-1</sup> | 88.73  | <b>2.91×10<sup>-2</sup></b> |  |
| TG             |           |           |            |            |                              |        |                       |        |                             |  |
| 16:0/16:1/17:0 | 0.40±0.27 | 0.41±0.28 | 0.88±0.69  | 1.87±1.76  | <b>1.67×10<sup>-9</sup></b>  | 1.02   | 1.00×10 <sup>0</sup>  | 113.88 | <b>9.98×10<sup>-3</sup></b> |  |
| TG             |           |           |            |            |                              |        |                       |        |                             |  |
| 14:0/17:0/18:1 | 0.32±0.21 | 0.3±0.21  | 0.72±0.52  | 1.24±1.09  | <b>4.72×10<sup>-9</sup></b>  | -5.98  | 1.00×10 <sup>0</sup>  | 72.06  | 7.96×10 <sup>-2</sup>       |  |
| TG             |           |           |            |            |                              |        |                       |        |                             |  |
| 14:0/18:2/18:2 | 0.78±0.44 | 0.69±0.38 | 2.19±1.15  | 2.28±0.75  | <b>4.72×10<sup>-12</sup></b> | -10.90 | 9.84×10 <sup>-1</sup> | 4.42   | 9.60×10 <sup>-1</sup>       |  |
| TG             |           |           |            |            |                              |        |                       |        |                             |  |
| 14:1/18:0/18:2 | 0.08±0.04 | 0.07±0.03 | 0.17±0.08  | 0.22±0.13  | <b>1.05×10<sup>-11</sup></b> | -10.86 | 9.90×10 <sup>-1</sup> | 30.58  | 2.35×10 <sup>-1</sup>       |  |
| TG             |           |           |            |            |                              |        |                       |        |                             |  |
| 14:1/18:1/18:1 | 1.41±0.79 | 1.31±0.68 | 3.73±1.71  | 4.38±1.61  | <b>3.22×10<sup>-12</sup></b> | -6.81  | 1.00×10 <sup>0</sup>  | 17.43  | 6.26×10 <sup>-1</sup>       |  |
| TG             |           |           |            |            |                              |        |                       |        |                             |  |
| 16:1/16:1/18:1 | 1.84±1.08 | 1.95±1.01 | 4.47±2.15  | 7.3±3.25   | <b>6.45×10<sup>-13</sup></b> | 5.71   | 9.97×10 <sup>-1</sup> | 63.36  | <b>2.77×10<sup>-4</sup></b> |  |
| TG             |           |           |            |            |                              |        |                       |        |                             |  |
| 16:0/16:0/18:2 | 5.36±2.63 | 5.27±2.44 | 11.51±6.84 | 19.98±9.02 | <b>1.43×10<sup>-12</sup></b> | -1.67  | 1.00×10 <sup>0</sup>  | 73.60  | <b>3.01×10<sup>-4</sup></b> |  |

|                |            |            |             |             |                              |       |                       |        |                             |  |
|----------------|------------|------------|-------------|-------------|------------------------------|-------|-----------------------|--------|-----------------------------|--|
| TG             |            |            |             |             |                              |       |                       |        |                             |  |
| 16:1/16:1/18:0 | 0.18±0.14  | 0.18±0.11  | 0.50±0.43   | 0.83±0.56   | <b>3.26×10<sup>-10</sup></b> | -4.04 | 9.99×10 <sup>-1</sup> | 67.28  | <b>4.62×10<sup>-2</sup></b> |  |
| TG             |            |            |             |             |                              |       |                       |        |                             |  |
| 16:0/16:1/18:1 | 8.52±5.39  | 8.25±4.4   | 19.97±9.51  | 32.03±16.98 | <b>3.22×10<sup>-12</sup></b> | -3.16 | 1.00×10 <sup>0</sup>  | 60.43  | <b>1.21×10<sup>-2</sup></b> |  |
| TG             |            |            |             |             |                              |       |                       |        |                             |  |
| 14:0/18:0/18:1 | 0.12±0.10  | 0.12±0.09  | 0.34±0.33   | 0.69±0.63   | <b>2.27×10<sup>-9</sup></b>  | 0.26  | 1.00×10 <sup>0</sup>  | 100.68 | <b>3.68×10<sup>-2</sup></b> |  |
| TG             |            |            |             |             |                              |       |                       |        |                             |  |
| 16:0/16:0/18:1 | 11.88±7.23 | 11.3±6.01  | 25.75±16.85 | 51.6±30.28  | <b>4.34×10<sup>-12</sup></b> | -4.89 | 1.00×10 <sup>0</sup>  | 100.42 | <b>5.77×10<sup>-4</sup></b> |  |
| TG             |            |            |             |             |                              |       |                       |        |                             |  |
| 16:0/16:0/18:0 | 0.90±0.92  | 0.83±0.62  | 2.32±2.95   | 6.67±6.31   | <b>6.79×10<sup>-10</sup></b> | -8.78 | 1.00×10 <sup>0</sup>  | 186.99 | <b>2.67×10<sup>-3</sup></b> |  |
| TG             |            |            |             |             |                              |       |                       |        |                             |  |
| 15:0/18:1/18:1 | 0.21±0.12  | 0.19±0.11  | 0.45±0.21   | 0.50±0.25   | <b>5.85×10<sup>-10</sup></b> | -7.66 | 1.00×10 <sup>0</sup>  | 11.75  | 9.79×10 <sup>-1</sup>       |  |
| TG             |            |            |             |             |                              |       |                       |        |                             |  |
| 16:1/17:0/18:1 | 0.97±0.56  | 0.98±0.52  | 2.17±1.01   | 2.98±1.94   | <b>8.71×10<sup>-11</sup></b> | 0.86  | 1.00×10 <sup>0</sup>  | 37.26  | 2.65×10 <sup>-1</sup>       |  |
| TG             |            |            |             |             |                              |       |                       |        |                             |  |
| 16:0/17:0/18:2 | 0.71±0.38  | 0.81±0.49  | 1.53±0.83   | 2.68±1.83   | <b>3.37×10<sup>-11</sup></b> | 14.61 | 9.91×10 <sup>-1</sup> | 75.71  | <b>2.48×10<sup>-3</sup></b> |  |
| TG             |            |            |             |             |                              |       |                       |        |                             |  |
| 16:0/17:0/18:1 | 0.37±0.22  | 0.43±0.33  | 0.86±0.58   | 1.64±1.55   | <b>8.92×10<sup>-10</sup></b> | 15.68 | 9.99×10 <sup>-1</sup> | 91.49  | <b>7.64×10<sup>-2</sup></b> |  |
| TG             |            |            |             |             |                              |       |                       |        |                             |  |
| 16:0/17:0/18:0 | 0.04±0.03  | 0.04±0.04  | 0.08±0.10   | 0.27±0.42   | <b>2.84×10<sup>-7</sup></b>  | 9.49  | 9.97×10 <sup>-1</sup> | 222.10 | <b>1.14×10<sup>-2</sup></b> |  |
| TG             |            |            |             |             |                              |       |                       |        |                             |  |
| 16:0/18:2/18:2 | 12.53±4.18 | 13.09±5.41 | 27.78±10.5  | 33.31±9.92  | <b>1.47×10<sup>-12</sup></b> | 4.43  | 9.99×10 <sup>-1</sup> | 19.88  | 2.07×10 <sup>-1</sup>       |  |
| TG             |            |            |             |             |                              |       |                       |        |                             |  |
| 16:1/18:1/18:2 | 6.66±2.56  | 6.97±3.05  | 15.96±4.89  | 18.37±5.42  | <b>6.45×10<sup>-13</sup></b> | 4.61  | 1.00×10 <sup>0</sup>  | 15.15  | 6.69×10 <sup>-1</sup>       |  |
| TG             |            |            |             |             |                              |       |                       |        |                             |  |
| 16:1/18:1/18:1 | 2.12±1.11  | 2.26±1.10  | 5.24±1.67   | 6.00±2.17   | <b>4.34×10<sup>-12</sup></b> | 6.53  | 1.00×10 <sup>0</sup>  | 14.51  | 9.03×10 <sup>-1</sup>       |  |

|                |             |             |             |              |                              |       |                       |        |                             |  |
|----------------|-------------|-------------|-------------|--------------|------------------------------|-------|-----------------------|--------|-----------------------------|--|
| TG             |             |             |             |              |                              |       |                       |        |                             |  |
| 16:0/18:1/18:2 | 35.22±11.85 | 37.1±14.83  | 75.58±24.99 | 91.92±25.31  | <b>6.45×10<sup>-13</sup></b> | 5.34  | 1.00×10 <sup>0</sup>  | 21.62  | 7.96×10 <sup>-2</sup>       |  |
| TG             |             |             |             |              |                              |       |                       |        |                             |  |
| 16:0/18:1/18:1 | 34.19±14.87 | 36.08±16.53 | 73.52±28.56 | 100.79±38.74 | <b>1.32×10<sup>-12</sup></b> | 5.54  | 1.00×10 <sup>0</sup>  | 37.09  | <b>4.62×10<sup>-2</sup></b> |  |
| TG             |             |             |             |              |                              |       |                       |        |                             |  |
| 16:0/18:0/18:1 | 2.77±1.96   | 3.14±1.98   | 7.39±7.05   | 15.77±12.86  | <b>3.73×10<sup>-10</sup></b> | 13.34 | 5.30×10 <sup>-1</sup> | 113.44 | <b>2.12×10<sup>-2</sup></b> |  |
| TG             |             |             |             |              |                              |       |                       |        |                             |  |
| 17:0/18:1/18:1 | 0.85±0.37   | 0.90±0.42   | 1.83±0.70   | 2.40±1.07    | <b>1.33×10<sup>-11</sup></b> | 6.59  | 7.20×10 <sup>-1</sup> | 31.12  | 1.98×10 <sup>-1</sup>       |  |
| TG             |             |             |             |              |                              |       |                       |        |                             |  |
| 18:2/18:2/18:2 | 0.95±0.38   | 0.99±0.47   | 2.25±1.16   | 2.03±0.83    | <b>4.26×10<sup>-9</sup></b>  | 3.73  | 7.80×10 <sup>-1</sup> | -9.71  | 9.91×10 <sup>-1</sup>       |  |
| TG             |             |             |             |              |                              |       |                       |        |                             |  |
| 18:1/18:2/18:2 | 5.38±1.74   | 5.51±2.12   | 11.83±5.17  | 11.27±3.74   | <b>2.95×10<sup>-11</sup></b> | 2.44  | 8.20×10 <sup>-1</sup> | -4.71  | 1.00×10 <sup>0</sup>        |  |
| TG             |             |             |             |              |                              |       |                       |        |                             |  |
| 18:0/18:2/18:2 | 0.88±0.34   | 0.98±0.37   | 1.79±0.86   | 1.99±0.64    | <b>1.14×10<sup>-10</sup></b> | 11.96 | 2.70×10 <sup>-1</sup> | 10.97  | 6.69×10 <sup>-1</sup>       |  |
| TG             |             |             |             |              |                              |       |                       |        |                             |  |
| 18:1/18:1/18:2 | 7.41±2.46   | 7.82±2.8    | 15.93±6.18  | 15.42±4.64   | <b>8.32×10<sup>-12</sup></b> | 5.60  | 6.40×10 <sup>-1</sup> | -3.22  | 1.00×10 <sup>0</sup>        |  |
| TG             |             |             |             |              |                              |       |                       |        |                             |  |
| 18:1/18:1/18:1 | 5.33±2.21   | 5.75±2.25   | 11.08±4.21  | 11.94±4.42   | <b>4.65×10<sup>-11</sup></b> | 8.01  | 5.20×10 <sup>-1</sup> | 7.74   | 8.95×10 <sup>-1</sup>       |  |
| TG             |             |             |             |              |                              |       |                       |        |                             |  |
| 18:0/18:1/18:1 | 2.03±0.95   | 2.44±1.29   | 4.95±3.32   | 7.63±5.29    | <b>1.40×10<sup>-10</sup></b> | 20.52 | 2.80×10 <sup>-1</sup> | 54.12  | 7.17×10 <sup>-2</sup>       |  |
| TG             |             |             |             |              |                              |       |                       |        |                             |  |
| 18:0/18:0/18:1 | 0.21±0.11   | 0.26±0.18   | 0.58±0.6    | 1.28±1.45    | <b>3.42×10<sup>-9</sup></b>  | 26.00 | 4.70×10 <sup>-1</sup> | 122.76 | <b>1.78×10<sup>-2</sup></b> |  |
| TG             |             |             |             |              |                              |       |                       |        |                             |  |
| 18:0/18:0/18:0 | 0.01±0.01   | 0.01±0.01   | 0.03±0.03   | 0.07±0.12    | <b>2.56×10<sup>-7</sup></b>  | 5.05  | 9.90×10 <sup>-1</sup> | 169.25 | <b>1.07×10<sup>-2</sup></b> |  |
| TG             |             |             |             |              |                              |       |                       |        |                             |  |
| 18:2/18:2/20:4 | 0.06±0.01   | 0.07±0.02   | 0.12±0.05   | 0.12±0.04    | <b>3.49×10<sup>-10</sup></b> | 12.17 | 1.40×10 <sup>-1</sup> | -3.45  | 1.00×10 <sup>0</sup>        |  |

|                |           |           |           |           |                              |       |                             |       |                       |
|----------------|-----------|-----------|-----------|-----------|------------------------------|-------|-----------------------------|-------|-----------------------|
| TG             |           |           |           |           |                              |       |                             |       |                       |
| 18:1/18:1/20:4 | 0.12±0.05 | 0.13±0.05 | 0.24±0.10 | 0.26±0.09 | <b>6.47×10<sup>-11</sup></b> | 3.64  | 8.70×10 <sup>0</sup>        | 7.78  | 5.96×10 <sup>-1</sup> |
| TG             |           |           |           |           |                              |       |                             |       |                       |
| 18:1/18:1/22:6 | 0.12±0.09 | 0.15±0.09 | 0.17±0.08 | 0.20±0.08 | <b>1.04×10<sup>-4</sup></b>  | 26.39 | <b>2.45×10<sup>-1</sup></b> | 15.24 | 8.67×10 <sup>-1</sup> |

a All values are presented as the means±SD of plasma lipid concentration in umol/L.

b Percentage (%) of difference between obese and normal-weight adolescents.

c We performed Benjamini-Hochberg correction for multiple testing.

d The black font was statistically significant.

e Abbreviations: NN, Normal-weight with traditional Normal clinical plasma lipid levels; NA, Normal-weight with traditional Abnormal clinical plasma lipid levels; ON, Obese with traditional Normal clinical plasma lipid levels; OA, Obese with traditional Abnormal clinical plasma lipid levels
